# Supplementary material for: Profiling of histone 3 lysine 27 acetylation reveals its role in a chronic DSS-induced colitis mouse model
Source: Royal Society of Chemistry journal article supplement (doi:10.1039/c9mo00070d), 2019-05-20
Supplement: c9mo00070d6.xlsx [file c9mo00070d6.xlsx]

## Sheet: eventual_fpkm_fc
gene_name	DSS-rep1	DSS-rep2	DSS-rep3	control-rep1	control-rep2	control-rep3	log2FC	p-value
1810065E05Rik	392.929	5688.84	1900.23	177.124	167.293	246.464	3.61657	8.4059e-05
Abca12	0.009053	4.91085	1.46158	0.007984	0	0	6.83945	4.32767e-05
Ada	7.67591	7.96059	6.88165	3.45755	2.53271	3.63095	1.11878	0.00104519
Aldh3b1	11.2756	13.9779	13.7432	4.555	5.27699	6.30135	1.23042	1.54584e-06
Alox5ap	32.286	33.0327	39.5331	10.4523	7.69252	9.10601	1.73468	8.82174e-12
Apol7a	7.31708	24.0475	7.07768	5.75121	3.92196	5.38858	1.40679	0.00397858
Arid3a	2.59921	1.32952	1.76978	0.862846	0.559565	1.06868	1.01913	0.00955568
Cd177	87.9393	37.5591	148.986	22.3857	23.6802	23.9709	1.76649	1.20612e-06
Cd274	5.25328	8.75219	7.407	3.59178	2.8042	3.13199	1.17893	4.11254e-05
Cd44	21.8502	17.1963	20.9296	10.755	7.84935	7.007	1.01309	9.4383e-05
Chsy1	3.30854	3.814	3.21112	1.5054	1.47156	1.43232	1.22761	1.33879e-05
Cidec	6.29569	13.054	10.3327	4.06002	3.13754	3.91847	1.19871	0.00048985
Clec4a1	5.75856	4.04568	8.01767	1.89879	2.18088	1.91037	1.70717	2.24327e-06
Cxcl10	29.8341	29.1393	63.6425	3.51908	5.51845	3.36453	2.97958	1.66167e-17
Dgat2	45.8431	41.9232	55.9429	17.8542	13.5629	17.3228	1.30611	3.85118e-09
Exoc3l4	1.00544	9.40247	3.75696	0.242386	0.739446	0.75787	3.0086	4.8244e-06
Fam78a	0.823936	2.79894	1.90385	0.142094	0.136644	0.197138	3.32375	2.95408e-08
Fbxl5	51.871	82.4579	75.9018	23.9929	21.0432	23.9711	1.51735	6.2781e-09
Fcgr3	39.1451	34.7141	35.5681	19.6446	13.8957	12.6371	1.01208	0.000569538
Fgr	2.74607	1.5256	2.29792	0.970592	0.450301	0.5535	1.31015	0.00491924
Fkbp5	55.3025	101.383	71.1053	26.9378	25.8011	28.3433	1.25662	6.02795e-06
Fli1	3.64875	1.98684	2.6296	0.863815	1.40763	0.97107	1.27056	0.000947285
Gapdh	0	21.4307	36.1213	2.00001	0.117489	0.144921	1.45268	0.00269928
Gbp8	3.91123	8.66542	5.91107	0.575597	0.801386	1.45642	2.65371	3.08294e-18
Gpr65	3.72377	2.93639	2.45086	1.01215	0.983252	1.36411	1.94921	4.8326e-06
Gsap	3.80463	3.20116	2.7371	1.08974	0.6993	0.931125	1.78115	2.46347e-09
Gvin1	10.4227	12.6354	12.2951	2.6	3.79985	2.39721	1.74634	7.30227e-06
Hdc	5.92822	8.29105	8.66434	0.382143	0.192147	0.376701	4.19083	1.7217e-21
Hsd17b13	4.7764	82.4914	24.7379	0.928562	1.21444	1.12321	5.22208	2.57119e-07
Ifit2	20.4187	7.69004	7.74228	1.46862	1.72704	2.0206	2.61869	2.85331e-10
Ifitm1	333.347	183.046	206.502	37.4759	26.2866	27.2567	2.74365	8.06133e-21
Igfbp4	258.629	73.8725	123.09	42.546	45.818	47.3762	1.50757	4.88043e-05
Iigp1	46.4111	52.9356	44.7949	2.11365	2.2041	2.48749	4.29496	2.07278e-73
Irgm1	57.5804	75.8489	52.9741	15.4338	19.2938	23.1397	1.55392	9.66946e-09
Lcp2	4.14561	4.5019	4.13429	1.31362	1.16862	0.98339	2.00011	2.29244e-09
Lpxn	10.1605	7.19248	6.89897	3.76402	2.956	3.47425	1.01219	0.000879183
Lrg1	34.4739	10.9144	30.0772	5.26628	1.79686	2.86027	2.6583	5.07158e-08
Ncf1	10.7125	10.6487	17.4656	3.8026	2.89053	4.07665	1.6339	1.28436e-08
Nppc	2.55006	0.764625	0.407925	0	0	0.062332	5.16302	0.000219823
Nupr1	356.273	725.325	935.24	222.16	137.507	152.829	1.76032	1.13501e-06
Prss27	3.64762	2.07662	1.15087	0.288276	0.184418	0.316633	3.2016	1.09227e-05
Pstpip1	5.20887	1.76664	3.39445	1.35093	0.880347	1.51157	1.35852	0.00441883
Ptpn22	2.14822	1.93226	1.40609	0.530476	0.28543	0.52906	2.13815	6.17697e-06
Rilpl2	26.146	18.1666	22.4668	4.5854	9.17687	10.8943	1.38174	4.7835e-05
Sidt1	6.84999	7.65635	10.9664	2.74567	2.65828	2.98821	1.2124	2.85248e-06
Sla	5.76148	3.39112	0.424874	1.58715	1.49956	1.86953	1.39667	3.66828e-05
Slc10a2	6.30848	62.3934	14.1155	2.05373	1.48978	1.60945	4.35058	5.02507e-06
Slc13a1	0.459521	18.8226	9.01282	0.123538	0.251399	0.258282	5.28344	4.54348e-05
Slc51a	0	101.164	24.379	0.128948	0	0	2.68905	0.00171578
Slc5a9	5.05642	3.82935	4.87013	1.67019	0.931451	2.23855	1.33024	0.000414775
St3gal1	3.97012	5.1626	4.35144	2.33761	0.729451	0.956081	1.63664	0.00027846
Tmem100	11.7679	4.02443	9.02039	4.30862	4.07866	2.67795	1.16394	0.00576175
Tnfaip2	15.7624	11.1892	14.6022	4.8305	3.02633	2.72367	1.77454	3.36741e-09
Tyrobp	131.407	123.44	127.617	46.2498	38.2866	40.2209	1.4248	5.77635e-10
Usp18	5.71426	4.32468	5.6938	1.48974	1.55984	1.91383	1.45186	3.70521e-06
Zfp385b	2.75653	2.68981	2.05667	1.16965	1.45604	1.33918	1.07357	0.000441835
