# Supplementary material for: Profiling of histone 3 lysine 27 acetylation reveals its role in a chronic DSS-induced colitis mouse model
Source: Royal Society of Chemistry journal article supplement (doi:10.1039/c9mo00070d), 2019-05-20
Supplement: c9mo00070d7.xlsx [file c9mo00070d7.xlsx]

## Sheet: supplementary_table_1
gene_name	DSS-rep1	DSS-rep2	DSS-rep3	control-rep1	control-rep2	control-rep3	log2FC	p-value
1110038B12Rik	105.299	217.515	137.793	42.6969	66.7001	59.8986	1.28165	0.000160204
1500009L16Rik	16.0386	25.4146	24.1019	9.27382	8.93236	9.225	1.08101	0.000354397
1700001L19Rik	1.04821	0.815022	0.842764	0.189362	0.197837	0.266806	2.04076	0.00230394
1700003I22Rik	1.20012	4.02934	3.82632	0	0.122117	0	6.59105	2.03197e-05
1810065E05Rik	392.929	5688.84	1900.23	177.124	167.293	246.464	3.61657	8.4059e-05
2010003K11Rik	50.2102	24.7574	40.2228	180.221	92.0453	100.356	-1.93543	1.80431e-08
2010010A06Rik	0.942557	1.86573	2.23692	3.69634	6.03709	4.35459	-1.79285	0.00101842
2210407C18Rik	107.227	367.236	118.355	18.9586	20.6472	21.4267	3.17899	1.136e-12
2310034C09Rik	0.180949	0	0	2.24314	0.676275	0.621352	-3.79031	0.00346363
2310079G19Rik	7.32535	0.044523	0.335267	152.909	63.7631	75.849	-5.75175	0.00397872
2410006H16Rik	245.106	629.253	338.093	96.6382	158.292	166.339	1.33023	0.000192266
2700038G22Rik	1.04986	0.342185	1.5539	0.176666	0.421943	0.324605	2.18774	0.00881919
2810408A11Rik	1.64756	4.80142	2.58411	1.12583	1.54887	1.07451	1.79881	0.00156522
2810410L24Rik	0.779641	2.0775	1.99742	0.391071	0.997846	1.37627	1.43641	0.000518027
2900076A07Rik	4.29532	4.93995	10.185	1.89769	2.35119	2.87175	1.25312	0.0037271
3110045C21Rik	1.61252	0.802377	2.1678	0.668107	0.711041	0.752064	1.37594	5.76646e-05
4930404I05Rik	0.201675	0.6051	1.03791	0.108603	0.156702	0	1.39962	7.4374e-06
4930509E16Rik	0	1.5191	0.686527	0	0.148262	0.25365	3.63757	0.00706307
4930539E08Rik	8.02038	7.72476	8.21603	20.7552	24.8546	34.5261	-1.94741	3.35756e-16
4930581F22Rik	0.347165	0.207794	0.758837	1.26865	0.761018	1.5406	-1.48512	1.10726e-06
4931406C07Rik	62.9812	130.578	32.8827	45.5388	12.8415	52.3826	1.00832	0.00136328
4933407K13Rik	0.333744	1.19448	0.735603	0.229898	0.417051	0.298131	1.53545	0.00312563
4933431E20Rik	4.19001	6.69977	9.0822	9.79867	6.5793	5.99859	-1.01232	0.000534943
5033404E19Rik	0.256384	0.076747	0.342684	3.07343	20.2763	14.4942	-6.75062	2.00236e-14
5330417C22Rik	9.973	16.1554	19.7041	7.95712	9.33381	11.2609	1.10962	0.00302703
5430427M07Rik	0.829933	5.6192	1.47603	22.1873	32.8067	19.211	-3.22585	1.37462e-10
5730507C01Rik	1.29084	5.22692	2.80539	0.318417	0.418751	0.260689	3.03895	5.12898e-06
6030408B16Rik	0.677744	1.41348	0.977583	0	0	0	4.23165	4.45584e-06
6330403K07Rik	3.11039	1.75795	3.50172	5.4372	6.21157	4.67497	-1.09205	0.00424156
9130015L21Rik	1.45025	1.33534	0.308823	0.214737	0	0	3.87108	0.000198993
9230116L04Rik	1.19125	1.75354	0.682968	0.472422	0.5666	0.572155	1.55293	0.0011117
9330158H04Rik	0.084564	0.017536	0.151081	0.546399	0.457417	0.333075	-2.22513	0.00011105
9330188P03Rik	0.246581	0.330365	0.260412	1.99042	0.59944	0.826606	-1.74779	0.00840158
A2m	2.83442	1.69454	15.5311	0	0.011923	0.012519	9.41306	3.01902e-10
A4gnt	0.741255	13.3838	20.873	0.587173	0.98207	1.26141	3.94125	0.000596121
AB124611	9.95458	6.32452	6.07778	1.57238	1.59858	2.04982	1.91	2.57843e-08
AI504432	1.32759	0.828562	0.786918	0.323392	0.19482	0.325277	1.71132	0.000157037
AW112010	1211.55	959.174	742.888	299.78	278.325	290.058	1.57217	6.20172e-10
Aadac	24.7805	19.11	19.2006	52.0569	51.8033	45.7999	-1.39484	1.67253e-10
Abat	39.3913	19.9437	24.6828	80.0077	92.5123	96.7148	-1.85479	4.35327e-12
Abca1	3.63723	4.01754	3.2431	1.25345	1.8446	1.29388	1.15413	1.44888e-05
Abca12	0.009053	4.91085	1.46158	0.007984	0	0	6.83945	4.32767e-05
Abcc5	1.72166	3.86579	4.94656	1.40471	1.61793	1.10572	1.0267	0.00605867
Abcc9	11.756	6.35784	9.43167	3.87737	3.85299	3.30428	1.09288	0.000194943
Abi3bp	6.40504	1.78068	1.35668	9.64148	10.5295	7.42106	-1.6931	6.30086e-05
Abo	4.57421	1.54106	6.13732	12.4008	8.94274	7.03216	-1.65947	0.000125032
Abtb2	1.35681	0.365349	0.63476	5.19167	5.1824	4.01193	-2.80889	6.92059e-14
Acaa1b	0.700362	14.8252	7.55434	1.07828	2.80845	1.1129	4.41345	0.00116996
Acacb	0.925906	1.80053	2.61267	0.387329	0.339355	0.47634	1.81587	1.06653e-05
Acap2	13.8289	12.2254	11.1374	30.5596	22.4917	17.7462	-1.16306	2.78233e-05
Acsf2	13.391	44.4525	30.6891	8.72802	10.5464	16.0268	1.16914	0.00424956
Acsm3	86.5091	15.5928	23.2181	121.502	134.919	114.955	-1.64717	0.000145116
Acta2	333.722	231.006	484.684	690.868	744.253	549.697	-1.14427	1.56179e-05
Actg1	868.272	771.702	952.424	2286.57	1085.78	1136.97	-1.14529	0.000447504
Actg2	284.569	204.913	736.735	815.894	689.004	627.898	-1.07442	0.00539374
Ada	7.67591	7.96059	6.88165	3.45755	2.53271	3.63095	1.11878	0.00104519
Adam12	0.564792	0.253321	1.53491	0.113054	0.071027	0.03132	2.4548	7.53946e-05
Adam18	0	0.652225	0.607303	0	0	0	4.37048	0.000326156
Adam8	2.43602	2.53134	4.73193	0.699909	0.18564	0.50892	2.60313	1.71631e-05
Adamdec1	107.456	387.673	111.229	67.7867	77.4239	74.1483	1.37446	0.00273403
Adamts1	6.0444	7.01506	6.06598	2.63175	1.69743	1.38916	1.62429	7.4111e-07
Adamtsl2	0.618543	0.535583	0.921353	0.058258	0	0.147626	4.11851	3.50161e-14
Adcy2	0.666947	1.12965	2.36125	0.428554	0.45439	0.530997	1.23308	0.00521468
Adh1	679.189	240.084	256.761	656.609	1256.38	1097.07	-1.50931	7.55745e-05
Adh5	60.6337	186.435	109.542	44.8568	56.7694	50.3682	1.12638	0.00308531
Adipoq	0.568002	0.338556	0	6.30441	5.4338	5.18312	-4.30637	1.46793e-14
Adra2a	1.27981	14.6376	12.0591	0.707632	1.41471	2.07203	2.60763	0.00742237
Adrb3	0.360947	0.135304	0.725546	0.570228	1.41485	1.63771	-2.56903	0.0002587
Adssl1	2.21451	1.73678	1.59674	0.286402	0.491683	0.521899	1.56307	0.00720588
Agpat4	36.7292	16.7261	22.6945	51.2515	52.8871	54.1126	-1.21269	1.53898e-06
Agt	2.68779	4.01222	4.12899	6.47674	8.0163	7.71176	-1.15083	0.000351014
Ahnak	43.3062	34.052	30.8076	63.7516	34.098	38.1411	-1.01776	0.00412922
Aip	16.0627	13.0273	14.3621	22.352	21.7513	24.8087	-1.23367	1.63376e-07
Ajuba	1.76666	0.917892	2.13129	0.517067	0.778305	0.692424	1.44924	0.00173715
Ak4	6.09597	20.1554	12.5907	2.51072	4.03895	2.90721	1.82399	5.65197e-06
Akr1b3	0.365467	0.347732	1.50668	3.01104	0.454745	0.407069	-1.39743	2.20718e-07
Akr1b7	1.93215	7.62378	3.02691	19.0492	8.41293	10.4501	-1.91675	0.000651795
Akr1b8	33.0917	59.5407	78.2784	149.555	80.0232	91.5368	-1.127	0.00219604
Akr1c18	0.892159	12.1679	2.9209	1.14531	0.222329	0.230692	3.1068	0.000445115
Alb	0.037312	0	0.064552	1.01224	1.0384	1.07695	-5.41621	8.58351e-06
Aldh1l2	0.461227	0.537211	1.76285	0.143895	0.126671	0.220509	2.2155	9.1113e-05
Aldh2	103.347	48.1661	54.992	195.864	196.282	207.304	-1.71877	3.04857e-09
Aldh3b1	11.2756	13.9779	13.7432	4.555	5.27699	6.30135	1.23042	1.54584e-06
Aldh3b2	3.34436	1.53296	1.711	4.36153	5.77855	5.71752	-1.0524	0.0070564
Alox5ap	32.286	33.0327	39.5331	10.4523	7.69252	9.10601	1.73468	8.82174e-12
Alpi	1.02785	9.8499	10.6833	0.214403	0	0.3789	5.31812	0.000731468
Alpl	5.87856	4.14719	4.05028	0.579455	0.614355	0.420148	3.13042	2.97062e-16
Ang4	2.16874	7.48449	10.3869	450.182	393.687	1134.64	-6.85614	3.34658e-44
Angpt4	1.88322	0.527382	1.44799	0.1737	0.267313	0.400947	2.09357	0.000681883
Angptl4	14.8101	18.0074	11.5586	5.04442	5.22167	3.5261	1.63254	1.64958e-06
Angptl7	0.9466	0.829728	6.13103	10.4308	5.61363	7.66028	-1.89045	0.00129174
Ank1	0.261619	0.369138	0.689685	0.96825	1.43283	0.98261	-1.74232	9.52471e-07
Ank3	2.55091	2.70771	3.82037	8.31274	5.16951	6.08616	-1.13983	6.25177e-05
Ankrd33b	0.373496	0.741814	0.176089	0.089886	0.042572	0.090252	2.12032	0.00681163
Ano1	15.3312	5.19208	8.55338	29.0969	39.2838	32.9841	-2.04923	1.57972e-09
Ano2	0.053181	0.06667	0	0.639174	0.383074	0.596061	-1.655	0.00570371
Ano9	12.525	29.3938	31.8859	7.39701	10.9032	12.459	1.11568	0.00155685
Anxa13	2.63909	4.97242	6.29755	8.94024	12.5959	13.6793	-1.55952	3.24381e-05
Anxa3	145.647	37.5231	130.468	219.171	182.946	178.83	-1.0719	0.00663613
Aoah	1.79696	2.23933	1.85257	0.977582	0.455946	0.553704	1.53835	5.57089e-05
Aoc1	58.2402	16.4264	8.9429	99.4679	189.218	119.429	-2.41804	0.00276392
Apbb1ip	3.79581	2.19709	2.42939	1.01477	0.617212	1.33821	1.22139	0.000417822
Apobec1	43.1912	34.3871	25.3306	114.13	52.6369	54.2716	-1.27015	0.000645491
Apobec2	2.0617	0.129556	0.231792	4.12871	5.01932	3.96498	-2.53586	0.000254418
Apod	8.84042	7.68806	15.5789	2.40002	1.80012	2.01009	2.4681	1.8066e-12
Apol10a	21.4414	237.664	146.588	3.70639	2.50375	7.22159	4.45544	2.59876e-06
Apol6	10.3005	15.7143	11.3122	2.31483	3.25855	2.20535	2.1187	4.63287e-11
Apol7a	7.31708	24.0475	7.07768	5.75121	3.92196	5.38858	1.40679	0.00397858
Apol7c	2.47084	5.51116	4.63877	8.84997	10.877	8.16753	-1.65027	9.62897e-06
Aqp8	268.13	186.118	242.915	1922.38	1251.8	1331.08	-2.90453	4.81096e-28
Arg1	6.33678	13.6373	12.2535	0.425849	0.099475	0.479177	4.79965	2.02545e-25
Arg2	10.2337	78.6728	17.5505	1.6481	2.56531	2.74838	3.52412	3.31848e-05
Arglu1	32.7372	52.9897	59.3746	17.725	24.3114	23.6775	1.06065	0.00046933
Arhgap20	0.107287	1.81966	1.30086	0.255056	0.397627	0.29999	1.87507	0.00258987
Arhgap28	0.676289	0.559531	0.640741	1.27472	1.49261	1.06602	-1.05954	0.00532509
Arhgap35	7.25586	2.62924	5.33645	14.3446	8.05662	11.6003	-1.42967	4.47857e-05
Arhgap9	3.9422	2.75615	2.43439	1.25914	1.30096	2.00003	1.21195	0.00230172
Arhgef10l	6.39106	3.13535	5.84183	11.9634	6.47788	10.2821	-1.08768	0.000877047
Arid3a	2.59921	1.32952	1.76978	0.862846	0.559565	1.06868	1.01913	0.00955568
Arl14	20.5366	36.3487	30.9338	14.1848	8.59547	5.37453	1.29903	0.00116537
Arl15	2.50723	3.45578	3.35351	1.14528	1.58483	1.55449	1.04811	0.000560797
Arl4d	6.02371	6.59392	12.9123	20.9406	15.6275	13.7892	-1.19466	0.00019118
Arntl	12.6996	8.36311	6.84166	25.1768	21.9788	15.5882	-1.42183	2.54882e-06
Arntl2	1.95151	1.2366	3.39328	0.487673	0.377424	0.344107	2.42699	2.56155e-06
Arrdc4	29.1999	31.1877	24.509	49.3027	28.4224	56.2175	-1.01823	0.000861599
Arsi	0.932002	0.090908	0.901348	0.597955	0.686934	0.421605	1.6396	0.00625705
Art2a-ps	1.94824	57.4361	28.7558	0.471747	0.18001	0	4.37956	2.64167e-05
Art2b	0.230506	1.67486	0.685106	0	0	0.092721	2.89702	0.00638303
Art3	6.45446	7.89684	9.68603	10.7929	12.683	9.29365	1.22364	1.28914e-05
Arxes2	5.43371	3.31446	7.79958	1.65269	1.13972	0.949842	2.50695	2.15228e-07
Asap3	0.880193	0.637746	0.85453	0.225909	0.24962	0.401779	1.21611	0.00715453
Asb4	0.374494	0.434811	0.304955	0.047148	0.022535	0.043695	2.56657	0.00242466
Aspg	3.95755	13.6165	14.5204	3.43426	4.08057	4.15693	1.33207	0.000984129
Asprv1	10.2198	16.2727	16.338	0.803795	0.544612	0.956105	4.10538	7.74472e-27
Atg9a	7.88928	7.8894	11.8353	8.70495	9.97377	10.4044	-1.09408	0.00216938
Atp10d	0.698158	0.427597	0.691318	0.256635	0.284735	0.276488	1.17729	0.00555572
Atp11a	4.6162	10.5207	9.7308	3.57285	2.88973	3.51843	1.15503	0.000509272
Atp12a	60.2676	0.631052	7.30604	312.686	114.076	406.464	-3.84826	0.00812974
Atp2c2	12.5173	5.02886	7.72757	23.1565	25.7275	23.5362	-1.8022	4.82676e-09
Atp6v0e2	11.5138	6.95768	11.3903	13.3239	21.968	20.4284	-1.11973	5.29355e-05
Atp8b4	0.679438	0.253834	0.798778	0.147086	0.070098	0.120481	2.56852	1.15109e-05
Axin2	1.42813	1.05256	1.29321	1.87912	2.58121	3.33603	-1.44353	1.61524e-05
B3galt2	0.527712	1.05185	0.621572	2.12446	2.04746	1.76867	-1.72747	0.000168989
B3gnt6	1.23307	20.6746	39.5996	0.625503	0.919409	0.996129	4.36129	0.000667907
B430306N03Rik	1.08501	0.638729	0.804945	0.05271	0.097302	0.110628	3.61897	1.30216e-08
B4galnt1	13.2638	24.3781	30.9951	5.10738	6.22367	7.24924	1.73367	2.5455e-07
B4galnt3	5.64294	0.993288	0.677533	5.12827	4.77064	6.32331	-1.59088	0.00298323
B4galnt4	0.934359	1.3334	1.73012	0.854678	0.169588	0.529228	1.81198	0.000164476
BB123696	1.76929	47.807	4.06618	0.15946	0.075564	0.322672	6.48391	2.99422e-06
BC100530	30.2475	73.1532	109.939	0.286294	0.799792	0.193663	7.85189	1.75072e-27
BC117090	0.781454	2.10796	0	0	0	0	6.66069	2.62031e-05
Baiap2l2	12.4563	19.6458	22.5748	6.07172	6.68672	9.41614	1.08993	0.00165963
Barx2	0.587357	0.105868	0.616265	2.14209	2.30993	2.58239	-3.14969	4.52355e-09
Batf	4.97575	1.74371	2.72467	0.86908	1.24587	1.33927	1.49246	0.00676033
Bcar3	20.7778	18.3344	14.0528	50.1249	42.4404	34.2596	-1.3175	6.38612e-07
Bcas1	21.9022	6.49782	27.8612	42.0331	41.5313	38.5466	-1.0079	2.22007e-06
Bdnf	0.456314	0.453	0.637881	0.1166	0.03613	0.040252	2.31145	0.00186598
Bex1	0.967925	0.898152	2.86268	5.51574	6.18122	6.20843	-1.81089	0.001254
Bex4	0.285314	0.292507	1.04754	6.15246	6.21539	6.0985	-3.60581	2.04623e-06
Bglap	0.682473	0.054638	0	3.74038	3.73413	5.00712	-3.48828	0.00154163
Bglap3	72.8766	41.8942	21.9453	9.36694	15.764	10.576	1.83953	4.67062e-06
Bhlha15	3.10314	0.991368	2.69293	0.568139	0.503503	0.633612	1.94953	3.66295e-05
Bhmt2	0.826035	0.186152	0.126201	0.031794	0	0	5.12207	0.00214787
Bmp2	13.0674	9.4338	7.99974	16.0179	35.0111	21.1885	-1.42548	5.92708e-06
Bmp6	1.25136	0.703538	0.482572	2.54471	2.7294	2.61963	-1.58657	3.83708e-07
Bmper	2.27317	4.5939	3.81875	0.565901	0.453603	0.385817	3.14912	9.47296e-14
Bnipl	3.33665	1.2119	1.41115	6.03282	5.72942	5.67289	-2.10384	9.70915e-05
Brinp2	0.768615	0.15973	0.394553	0.796956	1.37886	1.46551	-1.40834	0.00305108
Bst1	6.49587	6.08022	9.50252	0.80946	0.451766	1.26344	2.81772	9.36593e-14
Btnl2	1.98122	6.6572	3.02893	0.526115	0.256378	0.487482	3.25333	1.90865e-08
C1qtnf3	0.957584	2.30247	3.33886	8.3621	13.1421	10.5538	-2.51849	6.48916e-07
C230035I16Rik	1.1124	0.957545	0.517628	0	0	0.3173	2.12071	0.00498379
C2cd4b	12.3888	8.42717	16.9655	4.89721	2.46777	3.10368	1.52725	0.0001422
C3	121.936	96.4821	151.126	29.0089	11.2434	18.028	2.43184	1.04249e-12
C430002N11Rik	0.656206	0.01575	0.794134	0	0	0	5.86317	0.000273015
C4a	1.20637	0.936216	1.01141	0.158038	0.123398	0.268138	1.97354	2.62067e-05
C4b	44.0348	32.8973	32.5645	5.75892	5.94334	6.66769	2.40851	5.78465e-29
C6	0.629007	1.23745	0.214247	0.06927	0.057851	0	2.61117	0.00188668
C920006O11Rik	1.94541	1.49957	2.68953	0.503032	0.528337	0.661427	1.70296	0.000658545
Cachd1	2.73594	3.11057	2.30004	5.6375	6.83827	7.73055	-1.00754	0.000232104
Cacna2d2	0.672457	0.703001	0.570936	1.13976	1.25873	1.75364	-1.31233	0.00042297
Cadm1	1.24853	1.23738	1.00475	2.08199	2.83897	2.28048	-1.25106	3.84271e-05
Cadm3	1.02707	0.596146	1.62328	2.20317	2.11427	1.88944	-1.02541	0.00675921
Calb2	5.60314	6.16017	6.12858	14.6591	14.1515	12.7787	-1.25238	2.52803e-06
Camk2b	2.04218	2.87065	2.36146	1.33703	1.50698	1.84687	1.33903	3.72505e-10
Capn13	27.8834	7.56232	10.7239	48.0882	42.851	42.4388	-1.67544	1.1546e-05
Capn9	7.3495	6.29303	6.92303	15.4091	17.4389	12.3169	-1.28422	3.14768e-07
Capsl	0.389574	1.59993	0	7.53795	5.31288	5.76086	-2.81015	1.43066e-08
Car12	5.79448	22.5102	17.4255	3.65991	2.06965	2.24213	2.37675	1.90952e-07
Car2	297.294	327.965	491.314	649.943	958.279	1082.86	-1.49999	3.71162e-09
Car3	2.26822	3.88918	1.54303	18.9075	14.2871	14.9382	-2.89063	2.83858e-13
Car4	395.192	138.945	217.589	1735.27	1604.4	1648.01	-2.92479	7.3396e-19
Car8	2.0602	39.4791	25.9525	1.08454	1.5353	1.24892	3.89763	8.80007e-05
Cartpt	11.5076	5.55075	16.581	1.41706	1.57366	1.08013	3.06289	1.62574e-08
Casc4	2.76528	8.94836	11.5567	1.98284	2.25084	1.95894	1.70518	0.000111484
Casp12	12.6637	20.2633	15.4438	5.70583	6.41426	5.65578	1.33309	5.44363e-06
Casq2	1.26224	1.65728	2.09961	6.5199	7.02659	5.341	-2.13747	2.14357e-10
Cav1	44.6298	26.9803	50.3813	84.0468	73.5583	66.3285	-1.08727	2.74281e-05
Cbln3	0.435032	0.39599	0.361279	0.829075	1.08586	0.951179	-1.62189	6.86798e-05
Cbr2	16.5144	5.35649	7.29596	22.5404	26.8762	24.5501	-1.54486	0.000142883
Ccbe1	0.94589	0.937836	1.46443	0.112389	0.286786	0.22406	2.28706	1.17192e-06
Ccdc122	20.1865	16.4748	12.2634	4.31944	7.22433	8.35622	1.16561	8.94416e-05
Ccdc125	2.5299	1.74829	3.51003	1.14128	1.27144	1.42027	1.1779	0.00439461
Ccdc162	0.112963	2.78318	0.138683	0	0.066504	0.08633	3.55253	2.34664e-05
Ccdc3	4.0605	1.76796	2.74754	4.69118	7.32712	6.28064	-1.27065	0.000429123
Ccdc39	0.213605	0.309431	0.587184	0.196457	0.160461	0.144701	1.13243	0.0067801
Ccdc88b	1.40025	1.84641	2.29718	0.326908	0.360327	0.392494	2.12408	1.87236e-09
Cck	13.1633	13.5916	9.88473	1.31599	2.53611	0.731846	3.04753	2.57189e-11
Ccl2	41.0477	23.919	46.1717	8.7848	3.20535	1.71748	2.61114	0.00441619
Ccl3	7.87524	55.8737	61.8203	0.157876	0.496615	0.437407	6.30438	8.69e-10
Ccl4	13.1917	128.739	65.3711	0.950675	0.310765	0.605861	6.60618	9.15318e-11
Ccl5	24.3782	80.1602	129.278	2.05907	1.99697	4.5505	4.40113	6.01953e-18
Ccl7	52.2995	26.1132	39.3811	9.71486	2.00063	2.94028	2.87971	2.22946e-07
Ccl8	88.0916	213.408	61.0397	21.3358	15.6463	18.6	2.48248	1.85527e-08
Ccl9	27.0848	38.4422	45.3454	15.7887	8.53611	7.7782	1.52246	2.84113e-05
Ccng2	64.2505	93.7718	59.8301	200.602	111.783	78.9122	-1.03125	0.006443
Ccnl2	29.3711	56.9006	79.2544	21.1976	23.6383	23.1151	1.04328	0.0006406
Ccr1	11.3277	11.415	11.3013	4.79731	2.9043	2.74443	1.62858	1.97416e-05
Ccr2	6.73126	2.99014	3.72628	1.53596	1.83786	1.62898	1.29351	0.00082576
Ccr5	2.96244	2.81058	2.8884	1.20828	0.838306	0.772803	1.55572	2.30145e-05
Cd14	100.437	112.905	85.3348	45.417	37.2099	46.6949	1.00955	3.2497e-05
Cd177	87.9393	37.5591	148.986	22.3857	23.6802	23.9709	1.76649	1.20612e-06
Cd200r1	0.735599	2.36442	1.00486	0.588156	0.380597	0.396516	1.71553	0.00708718
Cd200r4	1.19479	1.69568	1.4943	0	0.331987	0.306734	2.7256	0.000157492
Cd207	0	0	0	0.895026	1.40066	0.568025	-5.77937	6.15483e-05
Cd209a	0	0.317309	0.162354	1.99563	2.01184	1.91236	-3.17652	4.7214e-06
Cd209f	0	0.718844	0	1.89929	1.87517	2.55679	-2.58629	0.000927983
Cd209g	0	0.275057	0	1.75843	1.01818	1.12196	-2.98879	0.00686553
Cd274	5.25328	8.75219	7.407	3.59178	2.8042	3.13199	1.17893	4.11254e-05
Cd300e	0	0	0	0.489677	0.394693	0.850312	-5.50342	0.000187158
Cd300ld	2.19439	3.49074	2.61998	1.21402	0.972612	0.769452	1.53957	0.00113219
Cd300lf	3.5356	3.94576	6.97501	0.470617	0.348268	0.672719	3.43477	7.74296e-15
Cd302	26.2693	23.2035	21.3324	7.94277	8.80276	9.10906	1.32247	8.54673e-09
Cd33	2.86114	3.7291	4.20012	0.929219	1.04726	0.546092	1.4239	5.71811e-06
Cd34	13.8857	8.20351	13.1167	25.5335	27.5649	22.6159	-1.28539	1.83887e-07
Cd36	2.07847	2.86249	3.71189	9.97187	8.86767	7.35333	-1.47702	0.000188748
Cd3d	4.75625	5.79076	2.38589	0.89145	0.771923	0.774225	2.51373	8.61131e-06
Cd3e	1.22624	1.38303	0	0.238493	0.106571	0.109131	3.63681	2.50234e-05
Cd3g	11.6074	24.9532	9.90114	2.05712	1.93855	2.62273	2.47269	2.33505e-09
Cd44	21.8502	17.1963	20.9296	10.755	7.84935	7.007	1.01309	9.4383e-05
Cd5	1.35222	0.514436	0.460895	0.077205	0.212051	0.130036	2.09985	0.00756109
Cd53	32.4515	25.1624	20.708	9.6584	7.53499	7.77806	1.53735	1.70848e-08
Cd7	2.49999	14.356	5.82972	2.14244	1.92123	2.18159	1.78564	0.00460781
Cd80	0.404486	1.06783	1.09463	0.361268	0.399104	0.03535	1.97941	1.4891e-05
Cd8a	0.889585	3.34885	1.18461	0.104926	0.201143	0.215556	3.07426	7.92756e-05
Cd9	429.517	232.463	256.22	643.675	556.052	542.884	-1.10315	4.50409e-05
Cdc42ep2	6.13806	9.17321	14.524	3.39986	3.30023	2.61058	1.41531	0.000200774
Cdc7	3.35731	2.88919	5.68081	1.04143	0.71423	0.439656	2.4734	6.52147e-09
Cdh13	0.971892	0.203282	0.524066	2.0545	1.62345	1.81115	-1.26249	2.32508e-05
Cdhr5	127.207	98.6016	88.6777	214.382	168.18	180.922	-1.0429	2.30846e-05
Cdk18	4.78393	8.03536	9.42212	2.45052	2.50927	2.50468	1.46509	4.19376e-06
Cdkn1a	64.4787	86.9642	109.034	278.764	235.227	171.118	-1.61021	7.54505e-08
Cdo1	8.78738	14.6347	12.8657	18.0388	26.4589	24.0181	-1.03306	0.000345703
Ceacam12	15.8952	31.6577	33.8295	0.87768	0.031159	0.058855	5.12219	0.00250951
Ceacam20	42.0392	21.3918	16.2196	69.0512	47.4206	48.9675	-1.20984	0.000567943
Cebpb	4.16244	56.09	79.4328	24.5891	18.2749	20.7171	1.52586	1.92374e-10
Cela1	307.944	77.2333	88.9534	474.488	736.747	669.887	-2.16721	4.1146e-07
Cemip	8.15938	0.87662	2.05538	0.311177	0.062913	0.104295	3.74109	3.19487e-11
Cep128	0.976504	0.379671	0.961579	0.651415	0.568771	0.296513	-2.70556	9.26914e-16
Cep76	2.7739	2.60642	3.74224	1.07658	1.46442	1.26621	1.08889	0.000531648
Cers5	20.6902	10.0653	13.9304	24.5339	32.951	28.1103	-1.04975	7.57508e-05
Ces1b	0	0	0	1.01061	0.809762	1.04496	-4.70626	1.10251e-05
Ces1g	5.78945	22.1785	8.90827	1.40713	1.19864	1.26467	3.12858	3.05521e-11
Ces2c	96.6184	280.767	137.274	336.521	364.093	369.953	-1.27058	0.000615039
Ces2d-ps	44.1964	129.231	67.811	136.843	150.334	154.445	-1.21639	0.000150312
Ces2g	4.71566	0.966607	1.59312	12.37	13.0209	12.1163	-2.48775	2.06974e-07
Cfd	2.49961	4.58225	1.33069	33.1053	24.2197	25.3776	-3.41306	2.19289e-15
Cfh	20.6837	19.3765	18.0601	8.4691	9.46236	6.2188	1.12369	6.76595e-06
Cgref1	59.8916	144.691	181.066	48.8229	52.1162	53.7057	1.24287	0.000395307
Chd9	2.91243	3.75289	3.64985	1.90097	2.1055	2.46322	1.46563	2.10625e-06
Chil1	9.3143	3.09435	3.57343	0.168369	0.270617	0.220335	4.09401	2.51768e-10
Chil3	51.6375	83.9607	135.162	0.822368	0.266393	0.177972	7.85473	6.08329e-19
Chl1	3.99372	2.23969	2.73362	0.721603	0.780563	0.592322	1.32546	1.97201e-06
Chn2	3.81839	13.5899	14.0039	0.696533	0.664823	0.940606	2.74532	1.18058e-10
Chp2	56.3729	14.6283	37.1098	135.84	100.853	119.47	-1.91558	2.05217e-07
Chrd	4.60566	3.51623	4.85671	1.32059	1.24116	1.36556	1.4156	4.01181e-06
Chrdl2	21.0242	7.24187	24.3764	2.27112	1.16085	1.76957	3.16027	4.14938e-11
Chrm2	0.798283	0.371727	0.717199	1.97841	1.25077	2.11123	-1.23864	1.36221e-05
Chrna1	0.065089	0.26577	0.701785	0	0.040456	0	2.42712	0.00963563
Chrnb4	0.633137	2.3584	3.63681	0.747747	0.608377	0.416658	1.9808	0.00184651
Chst11	3.14384	1.60077	2.29885	0.966419	0.926994	0.5127	1.21576	0.00584264
Chst4	18.7835	14.2151	20.8267	51.6055	23.3691	28.9587	-1.18841	0.000213139
Chsy1	3.30854	3.814	3.21112	1.5054	1.47156	1.43232	1.22761	1.33879e-05
Cidec	6.29569	13.054	10.3327	4.06002	3.13754	3.91847	1.19871	0.00048985
Ciita	1.41062	1.16057	0.978879	0.558818	0.448037	0.791209	1.25276	0.00148817
Ckmt1	1323.96	656.025	617.627	2445.52	2710.29	2462.42	-1.76901	1.4095e-08
Clca1	756.453	158.665	295.397	3793.03	3284.57	3963.6	-3.39958	2.35434e-15
Clca2	0.055557	0.05535	0	0.353246	0.348036	0.396837	-3.59748	4.16886e-06
Clca3a1	3.22555	3.95854	4.92028	1.30775	1.23873	0.835943	1.65568	3.49347e-08
Clca4b	383.964	171.42	220.46	57.6693	2.48925	8.44268	3.36706	0.00379363
Cldn10	4.7192	1.83702	2.25197	0.398767	0	1.08605	1.85108	0.00527274
Cldn14	3.65077	0.661006	1.18423	2.6664	6.53272	0.009956	-1.75207	0.00225846
Cldn15	35.3694	95.6769	115.192	19.1565	30.6098	42.0457	1.25553	0.00210416
Cldn4	21.7835	25.1063	29.4047	67.6892	32.8159	40.5593	-1.09236	0.000706873
Cldn5	5.35088	3.52958	5.80412	6.79034	11.2524	13.4182	-1.36755	1.5602e-05
Clec10a	2.42558	18.5952	4.86278	2.13668	2.47201	2.44248	2.11929	0.000467272
Clec12a	3.09958	2.59494	5.05312	0.649183	0.536825	1.03497	1.80313	1.7283e-05
Clec2d	197.649	498.42	299.403	61.5303	113.243	136.506	1.46587	0.000105578
Clec3b	11.2865	27.5407	15.7134	45.3667	65.3159	54.6706	-1.80426	2.06944e-07
Clec4a1	5.75856	4.04568	8.01767	1.89879	2.18088	1.91037	1.70717	2.24327e-06
Clec4d	16.6486	32.1243	16.7678	1.97352	0.238722	0.693587	4.49058	4.33777e-17
Clec4e	13.1485	25.892	18.699	0.235794	0	0.215121	7.19333	8.88781e-13
Clec5a	1.44537	1.37447	1.53079	0.605071	0.624189	0.293763	1.35516	0.00329294
Clec7a	11.4239	9.12807	0.186193	1.93275	2.97521	2.45966	1.83163	4.92758e-10
Clic5	23.4225	21.8418	16.4488	76.5816	61.7786	63.513	-1.85044	2.57337e-13
Clk4	20.4473	31.8188	34.6939	11.5101	11.3116	11.4478	1.03709	3.76227e-05
Clps	22.9027	6.43332	11.8757	30.5215	31.1862	53.154	-1.62326	0.00036447
Cma1	2.7346	1.03494	1.22591	10.0544	2.22241	3.22755	-1.97476	0.00732119
Cmah	2.30486	2.06079	5.29735	0.774433	0.426335	0.629242	2.30178	3.08109e-10
Cmc4	7.725	13.0026	8.13624	3.02245	5.80289	4.40648	1.08465	0.00526119
Cnn1	253.258	148.038	518.122	701.798	574.96	502.509	-1.23501	0.000609312
Col14a1	1.69472	2.83573	2.97658	5.76588	5.30727	4.22524	-1.23545	5.20419e-06
Col18a1	26.5576	4.55777	9.54946	5.53258	4.03421	4.06496	1.52289	7.47378e-05
Col1a1	19.2609	6.07089	31.0622	11.8481	9.3935	10.5709	1.2305	0.0022311
Col4a6	0.171695	0.340867	0.177469	0.583088	0.840581	0.710984	-1.79267	0.000137112
Col8a2	0.331097	0.201551	0.576562	0.724096	1.11226	1.07681	-1.81474	8.47917e-05
Comtd1	12.8288	5.31705	11.8071	15.512	20.0429	18.7467	-1.12813	0.000570549
Cox7a1	110.428	37.1541	59.4027	188.866	217.31	217.712	-1.94075	2.79129e-09
Cp	15.6246	6.87274	7.42967	2.7973	2.27096	2.72257	1.36865	3.8383e-06
Cpa1	2.71112	0	0	0	0	0	5.28075	0.00328054
Cpa3	1.03433	0.910173	0	0	0	0.078902	3.57503	0.00835991
Cpm	3.95061	4.85621	3.53371	18.1523	17.4572	12.7538	-2.25512	4.70915e-18
Cpne8	13.8055	20.6266	19.6389	7.72558	5.13258	8.05218	1.38624	3.67366e-05
Cpsf6	11.944	14.8286	17.6571	5.31473	7.11499	6.87517	1.02746	5.69188e-06
Cpxm1	7.71812	2.40598	2.4368	0.41678	0.419388	0.497421	3.23251	4.59118e-09
Cpz	1.06022	0.592695	1.74788	0	0.027087	0	6.49417	2.33244e-06
Crabp2	1.93439	0	1.87844	0	0	0	6.14611	0.000714921
Creb3l3	12.4029	9.25812	6.63742	2.58209	1.23759	1.32299	2.34731	2.27626e-08
Crip1	1438.96	931.708	1098.94	3421.76	3566.59	3276.95	-1.73584	1.62408e-16
Crisp3	0	0	0.266231	0.797232	1.62207	2.13823	-4.32602	0.0001162
Crlf1	2.38041	1.06784	6.73697	0.51302	0.680119	0.308231	2.54976	0.000143736
Cry1	9.48159	14.4747	9.8808	5.63205	4.29945	4.99648	1.00288	0.000538364
Cs	140.452	70.6656	111.447	255.737	235.249	242.552	-1.38386	7.59944e-08
Csdc2	0.260807	0.43361	0.472395	1.22431	1.67343	1.47436	-1.90976	7.7848e-05
Csf2rb	5.94325	5.28451	8.16045	1.0635	0.776885	0.825378	2.62243	6.7249e-20
Csf2rb2	2.5927	1.62834	2.6005	0.657506	0.383479	0.261134	2.40563	5.03018e-09
Csf3	11.854	8.56186	7.98877	0	0	0	8.39856	1.72668e-14
Csf3r	4.41019	2.25404	1.98891	0.088376	0.086299	0.120139	4.94787	1.33724e-19
Csgalnact1	2.053	1.00709	2.10046	0.185049	0.277611	0.275874	2.40593	3.63986e-08
Csrp1	309.056	155.273	335.762	553.361	600.027	468.617	-1.22111	1.51821e-05
Cst6	0.614944	6.89655	2.40494	0.06708	0.230224	0.194692	4.33071	4.94125e-10
Csta1	7.77199	6.9974	4.08235	13.4399	14.0505	11.0458	-1.20695	4.28204e-05
Ctgf	23.9746	10.64	38.5205	78.4214	38.9115	34.0344	-1.34414	0.00164231
Cthrc1	0.676044	0.93458	4.98775	0.158309	0.574521	0.294305	2.75846	0.00225701
Ctla4	2.48843	1.77228	2.41045	0.057515	0.119893	0.270131	3.98815	2.13797e-10
Ctps	29.2037	14.8964	20.7579	10.1414	6.62711	7.01621	1.32126	1.15461e-05
Ctsk	17.983	22.9701	20.7137	7.66187	9.14672	6.7068	1.15022	9.07361e-06
Cttnbp2	2.10842	0.782402	2.70915	3.75629	7.24634	5.77551	-1.85933	1.189e-05
Cux1	13.385	4.85192	8.10491	17.2171	17.038	16.1535	-1.09552	0.000332511
Cwh43	16.8948	11.9325	15.0532	3.59044	1.9914	1.97119	2.35977	9.94589e-12
Cxcl10	29.8341	29.1393	63.6425	3.51908	5.51845	3.36453	2.97958	1.66167e-17
Cxcl11	1.1721	1.36347	2.68869	0.268134	0	0.138267	2.83018	0.000814975
Cxcl12	136.795	167.797	93.7719	34.0387	54.6517	52.188	1.35264	1.05635e-05
Cxcl13	87.9688	54.9405	26.1035	17.2854	10.5671	16.8213	1.75098	5.29532e-05
Cxcl2	29.3511	168.541	141.376	1.06936	0.259413	0.441574	7.90601	1.34629e-15
Cxcl3	6.1493	65.2652	50.5695	0.50714	0.109412	0.058125	8.406	4.30205e-06
Cxcl9	23.8358	10.661	21.2542	0.57503	0.54878	0.634615	5.01362	8.52222e-49
Cxcr2	3.58338	3.06523	2.80235	0.083065	0.027229	0.03927	7.19806	2.16194e-15
Cxcr6	3.07979	5.24699	4.50227	1.14882	0.351358	1.02248	2.43184	4.96409e-06
Cybb	7.14771	3.80947	5.27486	1.55471	1.49451	2.22291	1.80128	2.82803e-07
Cyp1b1	0.149624	1.47815	1.13266	0.049242	0	0.094565	4.07948	2.14883e-05
Cyp2c40	4.82047	0.576389	0.887671	6.68065	12.9639	11.7144	-2.7354	2.59008e-06
Cyp2c65	17.9737	400.857	131.271	4.6264	6.42661	6.83444	4.81437	9.20318e-06
Cyp2c66	0.929776	29.5274	6.82012	0.273715	0.259649	0.415788	5.39282	7.03684e-05
Cyp2c67	0.833883	0.08988	0	1.26068	2.13728	2.01958	-2.7431	2.58397e-05
Cyp2c68	68.0434	7.81312	9.69155	103.54	180.651	140.291	-2.43918	0.00857134
Cyp2c69	1.69232	0.608181	0.450202	11.1778	21.1547	22.8619	-4.50831	5.93669e-19
Cyp2d10	37.5575	23.6604	16.3403	73.1252	84.9231	102.526	-1.88879	6.35694e-10
Cyp2d11	0.671094	0.557939	0.378525	1.89378	2.01556	3.11193	-1.62786	0.00149452
Cyp2d12	10.4914	6.52142	1.52408	46.3963	41.5933	54.5102	-3.16335	7.00891e-13
Cyp2d34	88.1513	101.954	77.3321	150.833	167.441	196.211	-1.02305	2.20265e-06
Cyp2e1	0.547531	1.1956	0.309714	4.67079	2.37649	1.87853	-2.15497	0.00138593
Cyp39a1	4.24808	2.28139	1.74852	4.0233	7.00756	5.83932	-1.09101	0.00107452
Cyp3a25	0	8.56706	3.04186	0	0	0	6.87485	0.000994479
Cyp3a44	0	11.2613	7.56358	0	0	0	8.10962	1.02913e-08
Cyp4f16	22.9259	20.5724	20.1073	49.9552	50.6181	57.7927	-1.54673	2.77358e-13
Cyp4f18	10.6801	8.25199	8.73527	2.07126	1.6628	2.0759	2.15757	5.25695e-11
Cyp7b1	3.58848	3.04098	5.01737	0.360359	1.29372	0.345106	2.86811	1.93799e-07
Cytip	10.9351	5.00846	4.15017	2.91798	2.25406	2.78685	1.1417	0.00153462
Cytl1	3.13536	5.79309	6.45389	8.06279	11.6095	9.989	-1.32125	0.000171848
D16Ertd472e	1.52371	1.30742	0.989212	0.586295	0.527644	0.406466	1.25534	0.000764539
D330045A20Rik	4.58017	5.74041	2.10749	10.5634	10.3965	8.2474	-1.33941	0.000321285
D630039A03Rik	19.0774	6.02895	9.66696	10.3934	33.9368	31.4655	-1.27925	0.0036887
D930020B18Rik	0.088461	0.493007	0.872517	0	0.054037	0.1442	3.06176	0.000614727
Dcp1b	2.68084	1.54829	1.7092	2.29689	5.71112	4.48063	-1.23653	0.000513464
Dcp2	6.9531	9.35348	14.0122	2.99455	2.60766	3.50885	1.61151	5.39243e-08
Dcps	17.7784	9.14499	12.4246	20.6798	27.4442	24.89	-1.19715	3.92452e-06
Ddah1	23.9008	19.8456	29.3645	9.40832	4.80983	6.38929	1.54588	1.73349e-07
Ddc	24.3898	15.1143	15.5421	55.2741	75.5273	57.2244	-1.86875	1.62886e-14
Ddhd2	3.3777	5.11523	5.95161	1.27046	2.30086	2.23397	1.06508	0.00159303
Ddit4l	0.291378	0.136676	0	0.259899	0.90629	0.62036	-3.13227	0.00451671
Defb1	6.26544	0.77293	2.73826	0	0.064258	0	6.11915	6.99731e-06
Defb37	2.12144	102.647	20.9218	0.283169	0	0	10.2952	4.24933e-05
Derl3	18.9663	6.12269	4.06505	4.08562	2.58852	3.36171	1.30746	0.0093639
Des	81.5821	41.3547	184.711	308.388	292.88	243.823	-1.6884	1.67029e-05
Dgat2	45.8431	41.9232	55.9429	17.8542	13.5629	17.3228	1.30611	3.85118e-09
Dio1	19.1476	36.6296	21.3335	63.5612	82.837	103.151	-1.83749	2.64893e-08
Dio2	6.48471	0.750107	3.08743	0.054632	0.023514	0.02051	7.64426	1.2234e-08
Dmbt1	646.702	692.918	949.277	268.916	192.834	253.891	1.49214	1.45383e-09
Dmp1	0.532836	0.20491	0.205281	1.97671	2.2107	0.497365	-2.52949	0.00317585
Dmpk	16.7935	11.7231	43.1332	46.7369	44.9224	40.4674	-1.15855	0.00210733
Dmxl2	0.976629	1.54645	1.19869	0.438709	0.44554	0.403112	1.18654	0.000833476
Dnajb5	6.18297	3.61545	7.42721	12.9696	8.76628	9.58687	-1.14865	0.000291771
Dnajc10	43.5915	45.476	83.0761	24.3995	24.7304	22.3883	1.10117	3.20335e-05
Dnase1l2	1.51978	43.5909	8.33338	0.388521	0.78608	0.954424	4.60021	0.00072562
Dnase1l3	0.884397	0.160626	0.23476	1.10155	1.14674	1.02959	-1.66119	0.00730675
Dner	0.651357	0.625512	1.11501	2.09353	1.64759	1.1429	-1.22292	0.00435569
Doc2g	1.17355	2.31414	3.44023	0.175264	0.692964	0.456404	2.44199	0.00203894
Dok3	8.69587	3.63605	5.52455	1.4609	1.56916	2.86246	1.37474	0.00136032
Dok7	0.344079	0	0.106226	1.66755	0.614246	0.668193	-3.55241	4.41538e-06
Dpep2	2.22193	2.63255	4.52696	0.745467	0.5916	0.393914	2.1353	6.39496e-05
Dpp4	2.05145	3.36073	2.73831	7.40989	7.17541	6.40177	-1.57998	1.31159e-07
Dppa3	0	0	0	4.62104	0.956741	0.776064	-6.1222	4.67373e-05
Dram1	9.95918	5.10395	7.57613	2.70174	2.33422	2.60452	1.27609	0.000346224
Draxin	1.038	0.284021	0.642621	0.012779	0.032565	0.049872	4.24873	2.40538e-07
Dusp4	0.954551	0.510431	0.494836	3.50923	1.03409	1.24569	-2.31291	0.00027715
Dusp6	22.0729	23.9243	24.3392	74.569	23.483	33.6251	-1.1562	0.00276592
E330011O21Rik	1.30728	1.83189	0.490643	1.74537	1.74708	2.83729	-1.14369	0.00252656
Ebp	26.4533	13.5711	27.5321	33.6776	47.8606	44.1296	-1.15384	0.000140051
Ecm1	16.8249	10.5527	13.9234	28.5484	27.1493	23.7095	-1.13016	5.13328e-06
Ecm2	1.35163	1.37407	1.5612	2.56012	3.77363	2.74036	-1.43941	3.21394e-05
Edem3	15.6559	24.3406	22.4683	9.18014	9.87296	8.64025	1.08027	5.60248e-06
Edn1	9.80627	7.03249	4.86834	10.1938	45.5045	19.4677	-2.04923	2.11784e-05
Edn3	1.14765	4.69684	4.28909	1.36869	1.61381	1.18813	1.32071	0.00818016
Eef1d	49.4154	27.3901	32.4273	67.0322	88.9878	65.8441	-1.23041	2.20673e-06
Efcab5	0.405737	0.495576	0.533726	0.045086	0.150405	0.064566	1.72503	0.000515797
Efhd1	0.210185	0.276932	0.783465	1.21011	1.43142	0.555097	-2.33643	0.00287279
Eif2s2	157.645	186.505	138.43	290.766	288.728	292.065	-1.10197	3.56636e-06
Emb	16.773	14.522	15.5338	3.10296	2.63995	2.02788	1.995	6.94462e-14
Engase	3.46891	6.67941	9.12472	1.198	2.95669	3.11246	1.33756	0.00302799
Eno3	55.1774	4.06249	9.08552	300.591	295.318	282.786	-3.91615	0.000120818
Enpp3	0.54042	0.294708	0.193384	1.49603	1.43971	0.800252	-1.4023	0.000281919
Enpp4	4.32299	6.36611	6.2565	2.14768	2.37366	3.08382	1.00288	0.00042764
Entpd7	1.85707	2.07775	2.45945	0.955164	1.19822	1.09334	1.21647	1.7312e-05
Epgn	1.62454	0.688275	1.70714	0.703141	0.061645	0.062668	3.24224	0.00191994
Ephx1	5.2573	2.44704	5.25356	11.0964	13.6821	11.906	-1.75456	6.33544e-07
Eps8	62.3038	19.9933	47.2989	97.9881	22.1265	67.3671	-1.09875	0.00946129
Eps8l3	105.737	82.8412	92.3961	305.246	130.799	161.287	-1.20495	0.000261922
Ercc1	5.20396	1.66286	4.75182	12.0381	9.77537	8.27668	-1.17375	0.000620569
Ereg	37.9419	18.016	17.0935	9.04702	3.51231	1.97183	2.05449	2.35538e-05
Eri2	8.75522	4.45819	7.46629	7.74116	10.8221	7.13877	-1.57455	0.000153026
Erich4	1.64121	10.4657	5.59067	1.12089	0.837377	1.18287	2.96472	1.37433e-05
Esrrg	0.728259	0.082361	0.211835	1.47856	1.61983	2.03176	-1.98977	8.48176e-06
Evpl	3.12223	0.800201	2.05444	2.17048	5.0181	4.52536	-1.2306	0.00491326
Evx2	0.22605	0	0	0.271508	0.355913	0.375409	-4.14175	8.7185e-06
Exoc3l4	1.00544	9.40247	3.75696	0.242386	0.739446	0.75787	3.0086	4.8244e-06
Eya2	1.14592	0.435578	2.12789	0.288786	0.143838	0	2.54627	6.07173e-05
Ezr	163.803	88.901	138.822	457.508	188.54	224.124	-1.34289	0.000223711
F10	1.31422	1.57681	1.25253	0.062068	0.021352	0.033529	3.9887	3.30731e-08
F630028O10Rik	1.59845	2.01496	2.94968	0.709951	0.495406	0.645888	1.70836	2.16891e-05
Faim2	0.268692	0.122177	0.248399	0.404995	0.524353	0.428489	-1.61375	0.00831527
Fam13a	5.49219	9.62225	13.5211	1.42411	4.32351	4.61708	1.17919	0.00907046
Fam162a	274.956	1260.15	769.076	213.593	261.541	258.976	1.49563	0.000525486
Fam180a	0.436327	0.316663	0.379971	3.31182	3.48853	2.15013	-4.26849	5.28701e-11
Fam187b	2.92778	0.902424	1.39759	3.14416	4.92044	4.40004	-1.37025	0.00462442
Fam189a2	9.12303	11.1995	9.96925	42.4418	24.099	16.3087	-1.70627	1.2497e-05
Fam198b	1.369	2.03461	1.72498	3.95759	4.29767	3.36149	-1.42769	2.47719e-06
Fam214b	14.0489	8.106	11.8163	41.159	15.3292	18.958	-1.45523	0.000135507
Fam227a	0.118219	0.455403	0.501493	0.028825	0.13495	0.11675	2.06306	0.00226189
Fam3c	10.4509	17.0449	13.1038	3.99959	4.98696	4.57765	1.38396	7.83774e-06
Fam43a	10.8015	14.7661	13.3706	6.9534	3.01045	3.48872	1.42739	8.04691e-05
Fam57a	16.1259	10.8048	11.3565	7.74238	7.57953	6.22768	1.12756	2.45063e-07
Fam78a	0.823936	2.79894	1.90385	0.142094	0.136644	0.197138	3.32375	2.95408e-08
Fam83h	11.4968	5.78086	8.73452	22.6526	11.7108	17.1718	-1.24693	0.000151012
Fas	16.7712	21.9225	17.9947	6.95601	7.85786	10.1999	1.04646	0.000143818
Fbxl5	51.871	82.4579	75.9018	23.9929	21.0432	23.9711	1.51735	6.2781e-09
Fbxo32	11.7866	9.49237	5.39892	22.2742	37.1003	33.8058	-1.93486	2.06007e-09
Fbxw10	0.080309	0.184554	0.039937	0.482093	0.383724	0.661581	-2.19043	0.00779388
Fcer1g	65.121	58.1555	62.5939	21.9834	16.8027	16.0653	1.64633	2.83729e-09
Fcgr1	5.73963	2.89434	5.17436	1.71077	1.14119	0.901897	1.79568	2.57958e-05
Fcgr2b	26.3068	24.0557	21.3612	9.85756	9.02806	8.36108	1.36369	1.68107e-07
Fcgr3	39.1451	34.7141	35.5681	19.6446	13.8957	12.6371	1.01208	0.000569538
Fcgr4	30.8336	35.058	32.9109	2.4372	1.96428	1.97854	3.94113	8.5118e-42
Fcrls	0.444714	0.255743	0	4.02623	3.19941	2.48784	-3.95721	3.04193e-12
Fer1l4	1.83356	0.163787	1.83689	0.222393	0.080171	0.115595	2.44015	0.00108074
Fgb	1.94528	0	1.22468	0	0	0	5.96438	0.000332523
Fgf12	0.242712	1.69451	1.18815	0.162017	0.254552	0.119193	1.56456	0.00594905
Fgfr1op	9.95985	8.72301	10.9251	3.1854	5.70119	4.89584	1.03182	0.00021066
Fgfr2	7.66535	16.5892	14.4633	6.46964	8.80274	10.1879	1.22149	5.61655e-08
Fgfrl1	2.84541	12.1288	8.42604	2.02012	3.25702	3.74236	1.3002	0.00886013
Fgg	1.43975	0.087396	0.990146	0	0	0	5.56421	0.000847647
Fgl1	1.01411	0.680729	1.20376	1.47163	1.55963	1.66822	-1.89059	0.00441024
Fgr	2.74607	1.5256	2.29792	0.970592	0.450301	0.5535	1.31015	0.00491924
Fhl1	181.254	145.838	131.222	277.9	379.854	322.486	-1.28907	1.93336e-08
Firre	1.67684	3.84858	6.15857	1.31327	1.54658	1.42894	1.15296	0.00566454
Fkbp5	55.3025	101.383	71.1053	26.9378	25.8011	28.3433	1.25662	6.02795e-06
Fkbp9	22.9172	8.86536	13.5421	28.7721	28.7773	31.4582	-1.10669	0.000489163
Fli1	3.64875	1.98684	2.6296	0.863815	1.40763	0.97107	1.27056	0.000947285
Flnc	3.46237	1.19697	4.12112	10.817	4.54248	6.63761	-1.57005	0.00025287
Fmo4	1.38434	1.25874	0.309947	1.85741	1.35387	3.62655	-1.61411	0.000258932
Fndc5	0.3686	0.558836	0.833681	0.642635	2.461	2.51352	-1.77917	0.00307116
Fnip2	2.10045	1.66732	2.41077	4.56776	3.31305	2.90765	-1.17871	3.758e-05
Folr2	1.69539	4.06272	3.20517	10.8913	8.5309	6.76866	-1.42066	0.000203597
Foxn1	0.220805	0.047383	0.238876	1.4041	1.06703	0.409731	-1.77634	0.000794203
Fpr1	6.41053	7.09869	4.5873	0	0.158282	0	6.2326	1.84423e-14
Frmd3	0.463703	1.64453	0.625905	0.217406	0.215797	0.169648	1.98738	0.00116149
Fst	2.9695	6.13244	4.24198	2.226	1.32534	0.778404	1.37564	0.00531486
Fut9	0.390093	0.017752	0.043912	1.11078	2.65146	2.22663	-3.5798	0.00147473
Fxyd5	42.873	37.2937	47.8351	21.7861	15.6918	15.3761	1.17776	1.86033e-06
Fyb	4.26973	3.04641	4.15465	1.51075	1.68704	1.61436	1.33687	0.00037147
Fzd3	0.122135	1.35258	0.995112	0.238599	0.177988	0.201952	1.87891	0.00376906
G0s2	13.0588	83.0939	35.9345	7.1186	10.24	9.11555	2.53751	1.49871e-06
G6pc2	0	0	0	0.729735	0.719918	0.436432	-4.20576	0.000471875
Gal	38.4036	10.1388	38.3521	5.16203	5.42143	4.94863	2.25014	4.39883e-08
Gal3st2	9.0995	17.7055	5.84763	16.8889	21.8282	26.3434	-1.03115	0.00851425
Galr2	0.269007	0.169476	0.173608	1.36879	3.10918	1.77035	-3.67485	1.34743e-08
Gapdh	0	21.4307	36.1213	2.00001	0.117489	0.144921	1.45268	0.00269928
Gas1	4.40146	4.72915	12.1725	12.6423	13.5473	15.4934	-1.26809	0.000380815
Gas2l1	10.0717	7.17569	8.35355	11.7091	12.3115	14.4648	-1.04464	8.38077e-06
Gatm	4.11047	2.41488	2.66118	8.05907	7.64576	8.20128	-1.66025	1.10179e-09
Gbp2	91.3408	61.6759	96.1758	37.6561	18.0794	21.6913	1.46801	4.10864e-06
Gbp3	15.7318	7.07147	11.2105	3.6017	4.13749	4.14438	1.15366	0.000439676
Gbp5	7.05581	4.18829	9.068	1.18503	0.621304	1.20433	2.19626	4.09841e-11
Gbp7	8.90826	8.46517	8.17305	2.83908	1.97805	2.62451	1.70806	1.27693e-10
Gbp8	3.91123	8.66542	5.91107	0.575597	0.801386	1.45642	2.65371	3.08294e-18
Gcg	48.4455	124.948	64.0239	30.2117	31.8811	30.7763	1.27784	0.000512802
Gcnt4	0.729775	3.57346	1.25558	1.16688	0.358173	0.342964	1.74695	0.00544909
Gdpd2	4.58946	6.07962	4.25339	0.788682	0.873818	0.955257	2.17712	1.69339e-07
Gfm2	9.74286	7.21738	9.17477	9.89391	12.498	10.8037	-1.58823	4.91947e-07
Gfod1	0.377346	0.281577	0.202236	0.841225	1.18759	0.671252	-1.67871	4.70802e-05
Gfra4	2.47674	0.758889	1.21346	5.68401	5.3834	4.56613	-1.87607	4.51084e-06
Ggt1	7.69459	21.7402	9.97705	0.522671	0.081437	0.383891	5.1057	2.55349e-22
Ggt5	6.79294	7.07149	5.21905	1.42215	1.58122	1.66948	2.06431	4.25933e-13
Gimap3	6.77892	3.71838	3.50033	1.87245	1.54789	2.56127	1.23233	0.000513606
Gimap4	8.33432	10.3294	1.57523	4.11206	0.882543	1.5095	1.19707	0.00198299
Gins1	9.1717	2.70104	7.22297	2.13958	2.64762	3.31297	1.21919	0.00606495
Gjb3	17.9314	5.24459	8.39475	42.8578	40.9233	36.1159	-2.16936	2.73657e-08
Gjb5	3.32503	0.093219	0.753402	24.4289	19.0528	22.4813	-4.33289	8.95827e-05
Gjc2	0.359292	0.294581	0.546122	0.957807	1.61783	1.71238	-1.87859	0.000558701
Glipr2	21.9129	16.6121	17.2835	6.18958	4.83325	5.67839	1.42102	2.36097e-08
Glp2r	0.638845	0.391744	1.02601	2.06032	2.40647	1.96043	-1.26185	2.79302e-05
Glul	134.067	40.0616	86.1402	151.678	157.723	164.133	-1.05816	0.00204857
Gm10732	0	1.82199	0.241409	0.050764	0	0.04485	5.23209	0.000168565
Gm11545	24.1061	23.3911	24.8175	53.5927	24.5561	29.629	-1.29975	0.00204027
Gm12250	8.15554	5.76085	4.6685	0.520711	0.315113	0.54551	3.89399	3.39724e-18
Gm13212	1.31129	1.24303	0.968394	0.743422	0.94508	1.02774	1.35214	0.000201566
Gm14023	0.611622	0.37781	0.431488	0.141251	0.510357	0.287981	5.56031	5.8291e-28
Gm14296	0.734949	1.90346	0.647301	0.672774	1.18272	0	1.45934	0.00375118
Gm15056	2.98603	0.804472	0	0.166368	0	0.380568	3.00444	0.00890925
Gm15401	20.6519	5.26089	6.11856	42.434	54.8682	59.7247	-2.49163	2.77327e-10
Gm156	0.20248	4.30226	1.6682	0	0	0	4.80592	0.00049645
Gm16675	0.878895	0.634709	1.14249	0.3575	0.313404	0.597358	1.19576	0.000151704
Gm1673	5.07303	16.1679	17.2434	2.1894	3.95567	1.75643	1.99455	0.000230663
Gm1965	0.50648	2.75157	0.682143	0.105677	0.179675	0.159602	4.37024	3.19549e-07
Gm2115	0.383205	2.32581	2.70686	0.157525	0.58255	0.49565	2.99811	5.40145e-07
Gm3776	21.7588	54.1414	73.722	12.3973	11.402	11.484	1.63762	2.00081e-05
Gm4070	6.36458	0	0	0	0	0	2.28438	1.0214e-09
Gm4262	1.29186	0.578402	0.605147	4.90664	3.19089	3.38337	-2.40619	2.85915e-07
Gm4841	1.82183	2.17441	1.03555	0.068262	0.044192	0	5.66276	6.77828e-11
Gm4951	1.54537	2.50099	1.94906	0.111919	0.184408	0.275041	3.70042	8.17079e-10
Gm4956	4.61183	1.42505	0.567319	7.44684	14.827	9.26203	-2.43617	4.1552e-06
Gm5069	0.222067	0.083475	0.277765	0.497031	0.704443	0.711481	-2.1208	0.000487939
Gm5150	1.81179	1.34716	2.58726	0.354675	0.377143	0.493776	2.58756	9.31238e-07
Gm5431	2.78394	4.47614	1.55259	0.264752	0.86588	1.45525	1.28173	0.006338
Gm5483	55.7298	133.093	103.615	0	0	0	9.89466	5.93866e-20
Gm6297	0.332339	0.868083	1.16522	0.080212	0.136125	0.262288	3.33254	0.000885163
Gm6329	8.78168	4.58164	5.3465	1.05641	2.13385	1.78555	1.80731	0.000366783
Gm8221	0.170641	0.400743	0.42237	0.760051	0.789065	0.861198	-4.48912	7.68195e-07
Gm9733	0.609147	0.421613	1.27792	0	0	0	5.95563	4.98424e-05
Gm9833	2.51098	1.35039	2.51201	0.721659	0.831761	0.789628	1.6419	0.00185576
Gml	4.27079	4.40966	7.55634	0.440544	0	0	5.96383	1.15329e-11
Gml2	3.68866	2.25462	6.10326	0.413763	0	0	6.08123	5.648e-09
Gp6	0	0	0.089152	0.487197	0.829883	1.27423	-4.56761	3.20213e-06
Gpc3	1.0957	1.6631	1.4953	4.01961	3.31065	3.51527	-1.30951	0.000144075
Gpc4	10.1017	2.97713	5.70496	11.6543	16.0736	12.303	-1.37068	0.000585208
Gpm6b	7.02287	2.97962	3.08694	1.86164	0.711588	1.86942	1.16799	0.00147891
Gpnmb	3.25301	2.63879	3.02802	0.999233	1.48086	1.04487	1.34677	3.22175e-05
Gpr132	2.46775	0.985531	1.67946	0.562294	0.406825	0.619116	1.61513	0.0034972
Gpr153	1.68717	0.693952	1.15378	2.2341	1.99833	1.42472	-1.21119	0.00452667
Gpr65	3.72377	2.93639	2.45086	1.01215	0.983252	1.36411	1.94921	4.8326e-06
Gpr84	0.763686	1.06746	0.940876	0	0	0.114749	2.92398	0.00431676
Gpr88	0.799764	0.491905	0.897281	0.312176	0.165097	0.08877	1.92651	0.00472935
Gprin3	0.296876	0.424165	0.402721	0.747529	0.72038	1.02709	-1.0619	0.00351601
Gramd4	6.1335	4.31617	6.24171	13.4011	8.75071	9.91815	-1.2118	1.16039e-05
Grb10	4.43776	5.72304	9.17333	2.50064	2.30193	2.41774	1.20928	8.14936e-05
Grb14	1.50998	1.51463	1.27579	3.58701	3.81501	2.88611	-1.1135	0.000834773
Grem1	49.8814	6.55365	32.3636	10.9758	7.23245	8.83824	1.98032	6.30719e-07
Gsap	3.80463	3.20116	2.7371	1.08974	0.6993	0.931125	1.78115	2.46347e-09
Gsdmc	4.02069	3.48812	1.92265	12.0502	11.9823	13.7303	-2.30011	8.01214e-09
Gsdmc2	71.63	85.2733	35.4685	140.335	108.558	174.697	-1.37984	2.72095e-05
Gsdmc3	23.168	24.726	12.6585	78.3644	86.1571	89.375	-2.30123	1.92474e-13
Gsdmc4	239.875	112.377	50.5492	720.752	709.271	666.257	-2.53426	1.29802e-09
Gsn	132.677	81.2771	92.9964	427.779	412.207	404.693	-2.21215	1.23527e-20
Gsta1	33.4823	80.8145	112.264	22.3748	14.6522	16.7449	1.57436	0.000296049
Gsta2	0.115217	2.57175	1.82869	0.179054	0.053503	0.639175	3.2646	0.00697875
Gstm1	30.8106	28.8268	45.6348	82.2205	100.897	92.2449	-1.56685	1.25158e-12
Gstm2	41.6471	19.0028	29.9544	64.3927	82.6595	80.0808	-1.68087	3.40606e-09
Gstm3	5.22054	4.59897	11.1569	14.8845	21.5406	20.0703	-1.88657	1.90556e-08
Gstm6	7.0351	4.09218	7.82925	9.42524	13.7115	11.681	-1.28568	0.000329364
Gstt1	29.3219	37.5145	30.5135	60.1842	59.7382	68.44	-1.12336	1.15758e-06
Gt(ROSA)26Sor	47.2	124.313	106.465	23.9088	27.9176	25.7629	1.07002	0.00115162
Gtf2a2	67.4462	135.048	111.445	40.1612	51.0557	41.8674	1.0748	0.000928405
Gtf2ird2	1.41452	1.06665	2.09278	0.80012	1.70742	1.31919	1.32665	4.65228e-07
Guca2b	16.804	60.4639	37.3473	8.05754	9.18181	11.3073	1.85719	2.08263e-05
Gvin1	10.4227	12.6354	12.2951	2.6	3.79985	2.39721	1.74634	7.30227e-06
Gypa	0	0.029783	0	0.575646	0.950335	0.551467	-5.84735	3.17566e-05
Gzma	22.0425	116.756	21.5191	1.81263	0.390631	0.916917	5.67907	4.96672e-08
Gzmb	3.64683	22.9958	9.03556	1.19902	0.63455	0.607663	4.2539	4.76044e-12
Gzmc	0.62373	0.505953	0.352997	0	0	0.058403	5.1901	0.00654491
H19	0.569588	0.247517	1.14418	0.010053	0.070745	0.025053	3.7634	2.56037e-05
H2-DMa	14.7508	11.0359	9.47827	4.14845	5.51534	6.52831	1.06045	0.000191882
H2-DMb1	38.7033	40.5827	26.2604	9.70306	8.38231	10.8368	1.66791	6.86918e-09
H2-Q10	4.73447	5.34276	12.992	2.15318	2.61154	2.10702	1.53114	9.34385e-05
H2-Q4	45.0632	33.3032	38.7786	14.6043	13.8691	22.3254	1.06207	3.01941e-05
H2-Q5	4.52217	3.53321	4.18443	1.12416	0.967712	2.65899	1.37621	0.00214428
H2-Q6	14.4762	11.2425	7.83368	2.39446	2.27915	4.6867	2.22215	1.78706e-15
H2-Q7	20.0048	12.5749	35.9107	5.16044	4.8017	4.10456	2.20926	5.21994e-13
H2-T3	0.418243	54.1576	16.8488	0.356486	0.481043	0.616049	6.0501	3.84736e-05
Hamp	1.29255	0	0.16736	9.59198	0.715355	5.56902	-3.65051	0.000502956
Hamp2	0.550146	0	0.146249	3.6898	4.12182	4.87638	-4.71634	2.26681e-05
Hao2	110.726	78.1142	85.1034	278.801	411.714	303.971	-2.06017	2.82781e-19
Hcar2	1.85279	7.00103	4.33425	0.302704	0.415563	0.5506	3.46785	8.91054e-10
Hdac9	0.733831	0.32447	2.10613	0.155581	0.184858	0.251798	1.23486	0.000329469
Hdc	5.92822	8.29105	8.66434	0.382143	0.192147	0.376701	4.19083	1.7217e-21
Hepacam	0.090672	0.030091	0.091492	0.876979	1.01983	0.747381	-4.54543	3.92248e-08
Hexb	88.9035	29.1165	28.3098	143.378	206.849	186.33	-2.01733	1.1091e-07
Hhip	0.943867	1.27262	0.461021	2.47144	2.88786	2.62652	-1.71347	3.89592e-07
Hid1	11.6899	4.53678	11.9995	15.8442	20.5419	21.5852	-1.36712	1.98263e-05
Hif3a	0.968907	0.197987	1.19503	0.473845	0.354326	0.526224	1.3192	0.00212412
Higd1a	115.28	357.089	313.384	90.1261	77.8018	83.2838	1.44635	9.52172e-05
Hist1h1c	184.416	98.8895	94.1582	340.064	389.056	565.721	-1.72421	9.4529e-09
Hist1h2ac	1.42801	0.809484	2.5213	4.81632	4.48036	6.65842	-2.5957	1.20792e-13
Hist1h2ao	2.65807	0.680662	1.79026	5.36405	0.059484	0.01131	-1.37404	0.00822553
Hist1h2be	26.5646	19.6158	16.2775	2.014	23.684	5.2042	-1.75004	1.81259e-06
Hist1h2bg	75.3253	73.4987	55.724	125.723	164.998	133.018	-1.63451	1.45009e-07
Hist1h2bj	12.6005	8.25602	7.26097	14.1504	21.4345	20.5365	-1.29657	0.00284985
Hist1h2br	8.34479	7.19336	5.74374	11.3141	0.582887	9.57457	-1.28296	0.00418318
Hist1h3d	2.46265	1.63868	1.73389	5.05976	8.22859	5.48471	-2.12634	3.41461e-05
Hist1h3i	1.11527	0.345945	0.414552	2.1113	2.17967	1.42304	-3.75649	0.00746488
Hist1h4h	18.4365	6.35509	12.3285	21.0655	44.7326	34.1239	-1.43117	0.000710281
Hist3h2ba	2.98518	2.74287	3.66588	4.88144	5.96883	8.57036	-1.67138	0.000778813
Hk1	24.9583	5.85126	10.3323	44.8545	31.2003	23.6154	-1.22237	3.67363e-05
Hk2	25.7596	18.1443	33.7081	63.2233	27.8446	42.0848	-1.03651	0.00251265
Hk3	1.52936	0.823607	1.30723	0.335937	0.305875	0.188006	1.7683	0.000104261
Hkdc1	0.638396	17.9132	10.406	0.369867	0.153264	0.436196	5.08972	5.31665e-06
Hlcs	1.42519	1.93443	2.31353	0.672123	1.00185	1.14572	1.06726	4.9272e-05
Hmcn1	0.579208	0.13065	0.140116	0.566669	0.945473	0.875049	-1.58141	0.00110829
Hmox1	8.99533	15.2175	32.2866	6.80624	3.46537	3.56973	1.66924	0.000170024
Hoga1	6.03912	4.40262	3.84654	1.26007	1.93653	2.39733	1.28569	0.00179017
Hoxb3	0.723714	8.44002	5.3102	0.72346	0.900733	0.841725	2.23764	0.000401425
Hoxb4	0.846313	1.77037	2.46001	0.194523	0.485649	0.252036	2.43206	0.00159766
Hoxb7	1.39177	40.841	15.4103	0.974985	0.994383	1.30851	4.18266	0.00048274
Hoxb8	0.095438	5.24757	2.72638	0.046768	0.044164	0.062656	5.83067	0.000116219
Hoxb9	8.35079	24.1021	22.7614	6.0372	9.24053	9.57034	1.02997	0.00656669
Hoxd11	1.01449	1.21007	0.455469	2.75886	3.61358	2.90664	-2.11973	0.000360976
Hoxd12	0.329518	0	0.051243	0.562192	1.47347	0.858152	-3.02387	0.00631801
Hoxd8	1.44407	7.2571	3.69171	1.27852	0.956915	1.15783	1.65428	0.0062385
Hp	109.031	36.9425	130.611	2.87331	1.76042	1.46777	5.47831	4.63395e-35
Hpgds	2.13945	2.17551	1.90465	4.55702	5.58866	3.98674	-1.2845	3.45154e-05
Hr	1.73471	0.666028	1.89109	2.76742	3.90196	3.30622	-1.41125	0.000327334
Hrh1	2.55766	2.46264	2.42796	6.16557	4.8545	4.88324	-1.03499	0.00032567
Hsbp1l1	1.20247	3.21106	3.77811	5.47383	6.7753	6.10288	-1.23746	0.000685996
Hsd17b13	4.7764	82.4914	24.7379	0.928562	1.21444	1.12321	5.22208	2.57119e-07
Hsd17b2	96.4258	150.508	76.5243	233.789	279.891	212.513	-1.32928	2.69165e-05
Hspb7	8.32008	3.34086	10.886	17.3639	11.1727	10.646	-1.04965	0.00700448
Htr4	1.59897	1.16217	1.93459	2.19989	3.85448	3.1928	-1.21546	0.00131283
Htra4	0.354352	0	0	1.04893	0.81286	0.855003	-2.81479	0.00490466
Iapp	0.531112	8.79996	1.54577	0.16107	0.488601	0.221493	3.7508	0.000632708
Iba57	2.42442	2.26318	2.03408	3.44285	4.45423	4.01475	-1.27846	2.74075e-06
Icam1	11.4038	4.09226	7.30858	2.76133	2.75568	2.7548	1.23687	0.00132993
Icos	1.17203	0.985525	1.27174	0.243094	0.231462	0.381174	1.77348	0.00065022
Id1	216.226	260.797	354.543	531.218	375.008	645.085	-1.10303	0.000107109
Ido1	89.3496	156.802	58.6919	9.44819	5.2956	4.14064	3.91555	6.16502e-21
Ier3	25.9371	36.5962	48.896	13.3084	6.75625	7.89092	1.65591	1.18006e-05
Ifi204	7.28558	6.84974	9.41958	3.6532	1.77687	1.59242	1.65514	1.08202e-06
Ifi205	13.6688	16.6735	18.5693	6.80828	3.58544	2.59899	1.52424	0.000140812
Ifi27	43.4616	32.79	38.8714	66.7951	77.9628	80.1486	-1.05703	1.58273e-07
Ifit1bl1	207.033	86.3318	48.2057	246.4	240.18	324.179	-1.45107	0.000778313
Ifit2	20.4187	7.69004	7.74228	1.46862	1.72704	2.0206	2.61869	2.85331e-10
Ifitm1	333.347	183.046	206.502	37.4759	26.2866	27.2567	2.74365	8.06133e-21
Ifitm3	235.447	109.904	159.107	62.5987	62.7893	61.6622	1.19921	1.96384e-05
Ifitm6	33.1513	36.0032	56.9916	1.93456	0.631033	1.06896	5.46247	2.15418e-31
Ifng	2.88815	3.02168	3.35813	0	0	0	6.19104	1.06166e-07
Igdcc4	1.08289	6.83736	7.343	0.762592	1.85925	2.2715	1.54522	0.00454963
Igf1	5.21602	3.22827	5.77087	2.02837	1.50022	0.901407	1.55919	1.56881e-05
Igfals	0.130996	0.128583	0	0.170587	0.557652	0.557753	-4.67676	0.000542634
Igfbp4	258.629	73.8725	123.09	42.546	45.818	47.3762	1.50757	4.88043e-05
Igfbp5	103.165	40.5728	46.7327	13.6267	12.1618	10.5957	2.24709	1.71894e-10
Igfbp6	6.14329	4.07866	10.6801	25.0787	22.3681	22.2545	-2.07311	5.14434e-14
Igsf3	2.62579	2.0575	2.43996	7.07238	4.24069	3.53184	-1.26858	0.000200974
Igsf6	3.38788	2.04239	2.41511	0.59599	0.642327	0.368763	2.08971	5.00617e-06
Igsf9	5.54516	4.51815	5.84426	13.7477	21.2222	18.5661	-2.12568	5.98842e-22
Iigp1	46.4111	52.9356	44.7949	2.11365	2.2041	2.48749	4.29496	2.07278e-73
Ikzf1	3.02638	0.983218	1.38797	0.548901	0.517998	0.934771	1.28835	0.00441509
Il10	1.00707	1.9164	1.06767	0.304894	0	0.160502	3.11024	0.000390585
Il10ra	3.49819	2.70606	2.56257	1.32296	1.03737	1.7519	1.14251	0.000689622
Il11	15.3014	2.18765	4.26979	0.123056	0.117618	0.090006	4.88389	7.3647e-13
Il12rb1	0.482146	0.647408	0.60313	0.046719	0.019943	0.027363	3.60638	6.20755e-05
Il17a	0.687275	0.317945	3.36391	0	0	0	3.42589	0.00828877
Il17rc	38.8953	32.3628	45.8477	56.9034	87.8527	77.5455	-1.05865	8.93548e-07
Il17re	2.43568	2.76406	1.89385	2.5185	4.61158	6.11586	-1.05721	0.00213709
Il18	308.967	111.111	159.98	468.198	426.298	446.264	-1.3945	1.43613e-05
Il18bp	26.6719	19.9492	15.2841	5.00055	2.32737	4.15801	2.01557	1.26914e-09
Il18r1	0.620714	0.450375	0.470266	0.216365	0.112188	0.090109	1.90545	0.0031838
Il18rap	1.99126	1.42461	0.824702	0.255631	0.190671	0.113323	2.77788	1.26864e-05
Il19	2.2403	2.25649	2.48099	0	0	0	7.5793	2.49894e-08
Il1a	8.42628	39.0393	28.574	0.806613	0.057571	0.082783	4.78136	3.431e-19
Il1b	124.698	337.703	284.382	4.3743	2.0315	1.85712	6.49315	3.63581e-52
Il1f8	0	2.26853	0	0	0	0	5.51982	0.00540597
Il1f9	4.82967	10.7838	4.36873	0	0	0	8.61498	2.30402e-11
Il1r1	11.8535	9.27203	10.2141	4.5517	5.19156	3.90117	1.0312	3.23548e-06
Il1r2	17.8174	35.1544	31.7184	1.44058	0.317175	0.666365	5.1304	2.07997e-26
Il22ra1	8.61951	5.7734	6.66439	14.0719	12.1742	12.1536	-1.29831	0.00195672
Il22ra2	1.20031	0.70688	0.09639	3.53492	3.01107	4.3226	-3.04613	1.63051e-09
Il2rb	1.16696	1.73898	1.13543	0.385074	0.282712	0.676256	2.18768	8.41746e-06
Il33	15.96	15.8305	19.8217	4.23898	2.70594	2.43834	2.1658	3.18881e-13
Il4ra	18.5042	10.5194	16.7466	8.45082	3.94951	6.38382	1.07714	0.00144504
Il6	11.4108	8.95179	9.36531	0.244528	0.213473	0	5.32106	9.6487e-20
Inhba	0.31875	0.725297	0.551682	0.283402	0.487162	0.180496	2.36342	2.76116e-10
Inpp4b	2.74042	1.46794	1.65604	3.10786	3.95253	2.50457	-1.05101	0.000629466
Insl6	41.1662	62.0631	27.9114	12.1609	9.60422	13.4922	1.81667	4.21718e-06
Insrr	0.192796	1.2505	1.64626	0.111415	0.137819	0.100528	2.87147	3.32527e-05
Ippk	9.62184	5.60152	7.4127	33.8763	12.404	10.756	-1.49121	0.000576977
Irgm1	57.5804	75.8489	52.9741	15.4338	19.2938	23.1397	1.55392	9.66946e-09
Irgm2	20.1195	15.3755	16.7052	5.11783	4.59571	6.83171	1.49703	2.30856e-09
Irs2	1.65623	0.944693	0.704584	2.99521	2.05947	2.57968	-1.08995	2.177e-06
Isx	24.4601	123.275	84.1047	3.76219	1.24108	4.40486	4.47664	1.09658e-07
Itga2	2.50068	3.31739	2.55224	1.33798	0.347548	0.447203	2.07752	2.17533e-08
Itga8	0.356514	0.168036	0.590305	1.40277	1.91731	1.30277	-2.3212	1.22384e-07
Itgal	4.31343	2.3063	2.63858	0.903196	0.667433	0.883471	1.78933	2.98689e-07
Itih2	0.534873	0.097711	0	3.68548	4.10623	3.98828	-4.3199	9.03956e-16
Itih3	1.48217	1.32538	0.826656	0.348846	0.03617	0.140554	2.74274	2.87436e-06
Itih5	27.193	11.9656	13.7191	43.4813	50.9071	48.8997	-1.653	5.63404e-08
Itk	0.520651	0.771172	0.539611	0.246408	0.113931	0.186117	1.62056	0.00334838
Itln1	0.633541	1.5495	2.15814	1.92009	4.33292	10.0895	-2.35831	3.19212e-05
Itm2a	20.7655	11.1671	41.68	8.54763	8.5724	6.24823	1.45989	0.000557336
Itpka	2.76566	10.4336	3.66535	0.535895	2.21289	2.0323	2.32499	0.000533629
Izumo4	6.69805	9.3355	11.8911	3.07219	5.22692	4.94164	1.12085	0.00150012
Jag1	2.47947	3.53844	3.9035	0.998213	1.65241	1.53484	1.07965	0.00215595
Jph2	3.81538	2.0973	6.23347	6.82446	7.80364	7.09421	-1.03147	0.00579574
Kazald1	1.20653	1.94754	1.05164	2.4943	6.44968	5.43702	-1.69538	0.000179665
Kbtbd11	3.77574	17.3346	10.2928	3.01672	3.70375	4.7638	1.31	0.00414109
Kcne4	12.2797	18.845	28.3194	1.37886	3.66702	2.7348	2.77316	2.50844e-12
Kcnf1	1.16663	1.30766	1.88053	3.49629	9.97164	6.13937	-2.42076	8.89339e-10
Kcnh3	0.357727	1.3725	3.59684	0.082328	0.037341	0.205394	3.34786	2.50413e-05
Kcnj16	1.95747	0.436086	0	0	0.071878	0.030398	3.57885	0.000661101
Kcnj8	45.182	22.0421	29.3488	14.5304	12.0694	11.6655	1.12097	0.000168615
Kcns3	0.784109	0.618144	0.539396	1.37923	1.39196	1.40572	-1.64539	8.66842e-05
Kif12	1.06002	2.61914	7.34547	0.636895	1.27374	1.28554	1.78025	0.00283825
Kif13b	6.89925	2.38774	2.34978	11.24	3.58018	7.00744	-1.00916	0.000392557
Klb	1.16712	0.047407	0.302361	2.15707	3.90595	3.92155	-3.05307	0.00606483
Klf9	10.6258	6.57852	7.81488	18.7977	18.2143	18.6067	-1.39073	2.81507e-07
Klk1	967.786	2308.56	2108.55	3521.04	4476.42	3793.78	-1.26824	0.00011099
Klk1b11	0	0	0	9.19539	18.9663	14.1533	-1.56764	0.00177998
Klk1b4	0.7404	2.49191	0.71526	5.31596	4.71528	5.58977	-2.14926	0.00521412
Klk1b5	18.6586	34.2317	38.6816	72.5613	69.4828	99.1085	-1.53214	3.32711e-05
Klra17	0.671317	0.509245	0.756401	0.322676	0	0	3.76321	0.00455855
Klra2	3.75769	4.0543	6.48898	0.581082	0.909135	0.360707	2.82174	3.64244e-08
Klra3	0.604865	0.532715	0.29758	0	0	0	5.66608	0.00107788
Klra5	0.066228	1.79936	0.5654	0	0	0	4.44905	0.00346418
Klrc1	1.31624	1.73319	0.771971	0.061091	0.187227	0.189759	2.91316	8.74607e-05
Klrd1	4.96624	16.0854	7.14338	3.13305	1.81204	2.15391	2.0045	0.000103716
Kng2	1.16711	2.19422	1.88308	0.244639	0	0.06129	2.90946	0.00144062
Krt17	1.65629	0.276458	2.52188	12.7604	12.2111	7.5257	-3.68764	1.00718e-14
Krt18	130.583	72.6809	149.727	497.914	239.346	247.99	-1.70067	1.93019e-06
Krt19	1539.54	674.771	1202.19	3436.63	2521.97	2261.13	-1.4822	1.82693e-06
Krt23	10.2514	5.88772	5.92196	2.2939	2.28621	3.19553	1.51836	3.93581e-06
Krt5	1.41199	0.023509	0.249446	0	0.026877	0	5.08425	0.00119846
Krt8	2750.9	2405.44	2719.85	5591.83	4207.66	4088.26	-1.00072	1.06484e-05
Lacc1	7.38326	4.15849	7.48616	2.25763	3.01984	2.78912	1.17745	0.000193025
Lama1	1.53111	0.512982	0.496273	0.268199	0.125561	0.097938	2.24037	1.93101e-05
Laptm5	21.7311	14.2909	13.1725	6.03866	4.5287	7.67825	1.23928	9.67044e-05
Lat	4.29969	3.66239	2.55218	0.551958	0.761103	1.38458	2.47272	5.79681e-05
Lbp	7.57114	12.6114	17.4427	6.80993	3.46275	3.23827	1.20493	0.00253903
Lcn2	124.06	148.163	334.85	9.48547	5.93233	5.36251	4.65386	4.76372e-33
Lcp2	4.14561	4.5019	4.13429	1.31362	1.16862	0.98339	2.00011	2.29244e-09
Lgi2	1.06564	0.901583	2.09308	0.351605	0.224153	0.092771	3.84507	5.41238e-28
Lgmn	132.764	210.053	150.173	56.9924	54.1767	52.4538	1.43937	4.2271e-08
Lhfpl2	22.4219	32.0282	20.4927	88.7699	45.1213	66.7281	-1.63156	1.39953e-06
Lims2	8.04398	3.60436	13.0753	15.2912	19.7515	16.2044	-1.25534	0.000741831
Lmcd1	12.658	2.35649	2.03097	1.56305	1.70929	1.88202	1.9048	0.00273248
Lmo7	43.5026	26.6419	29.3277	143.434	41.419	53.7392	-1.49257	0.000504508
Lox	21.4672	13.8369	37.0795	1.34783	2.24249	1.61499	3.66475	3.33631e-26
Lpcat4	14.6903	10.7349	24.1731	7.796	2.94777	3.94806	1.53459	0.000299188
Lpo	23.4048	16.5897	14.5714	1.55818	1.16178	0.434371	4.16474	8.71509e-29
Lppos	8.1653	10.4477	11.4958	2.79129	5.28533	4.64062	1.09204	0.00160114
Lpxn	10.1605	7.19248	6.89897	3.76402	2.956	3.47425	1.01219	0.000879183
Lrg1	34.4739	10.9144	30.0772	5.26628	1.79686	2.86027	2.6583	5.07158e-08
Lrp8	0.823666	0.345952	0.899122	0.305321	0.085815	0.177618	1.55271	0.00231483
Lrrc32	4.74732	1.7613	3.50302	1.14535	1.14729	1.38622	1.33211	0.000637039
Lrrc8b	1.24394	1.05665	1.32269	0.978042	0.265789	0.168899	1.10041	0.000411641
Lrrn4cl	0.458793	1.14664	1.37246	2.51838	1.82007	1.6296	-1.36002	0.00866775
Ltb4r1	2.35456	1.30576	2.14589	0.338864	0.192883	0.480707	2.2359	0.00150305
Ltbp2	0.999532	0.063739	1.03948	0.074007	0.049645	0.056603	2.68381	0.000645419
Ltbp4	8.1878	4.01107	6.96282	18.615	17.942	20.0667	-1.71615	1.73974e-09
Ltf	2.94962	1.16167	2.53186	0.058349	0.057463	0.031105	5.10167	3.90892e-11
Ly6c1	290.245	119.903	211.919	132.784	55.524	63.6955	1.01632	0.00809402
Ly6f	0.540909	2.84969	1.81608	0.15154	0.06376	0.295182	3.11009	0.003992
Ly6g6c	0.505748	0.080225	0.709067	4.18111	1.85683	2.92919	-3.51423	4.659e-05
Lyz1	12.2113	4.91894	2.66987	14.0769	11.5739	17.0642	-1.53351	0.00219952
Madcam1	12.7625	3.29149	5.81751	1.9631	2.53078	2.97712	1.46027	0.00086632
Maob	5.38458	9.15022	8.68714	13.6342	17.6933	17.0444	-1.12482	0.000263255
Map3k6	2.54879	1.04572	1.56671	7.93481	2.6865	3.02301	-1.72089	0.000376313
Mapk15	0.761698	0.354371	0.384376	1.29709	2.30555	3.32739	-1.61584	0.00248164
Marcksl1	66.5395	51.1213	48.2972	15.4066	10.329	14.4579	1.89327	6.10828e-13
Marco	1.47423	1.62724	0.280179	0	0	0	5.53805	3.78203e-05
Mark2	11.1074	8.07661	2.03598	22.3747	14.3314	17.0102	-1.09638	1.70903e-05
Max	53.3535	51.7173	48.3529	77.5082	90.9841	89.727	-1.08269	7.11747e-08
Mboat1	62.9358	36.781	49.8039	131.634	111.806	87.4964	-1.37601	1.3548e-07
Mboat2	4.55917	8.96094	6.44613	1.574	1.81957	2.76668	1.70924	3.75427e-06
Mcemp1	13.4587	10.5247	10.6294	0.662653	0.266783	0.544358	4.93452	3.237e-28
Mctp1	1.59129	1.36017	1.53162	0.529844	0.514467	0.371847	1.51571	7.93302e-05
Me1	4.25786	9.72691	3.01868	4.6561	4.42491	3.44426	1.05081	0.00956863
Me2	52.4162	38.5839	34.4884	75.8344	70.088	87.8282	-1.09776	3.94409e-06
Me3	0.128721	0.288671	0.054321	0.333241	0.608279	0.57118	-1.38271	0.00394929
Mecr	44.3445	18.7207	28.2584	46.3847	60.0247	55.9674	-1.09596	0.000154018
Mefv	1.28574	1.56066	1.58936	0.496062	0.15034	0.31544	2.39591	3.81418e-07
Mep1a	35.7967	112.534	52.5237	122.585	131.355	141.401	-1.13907	0.00386032
Mest	2.40266	2.4903	4.7638	1.11614	1.00385	0.493748	1.1129	0.000480603
Methig1	0.69246	0	0	2.24658	3.98109	1.64859	-3.24499	0.00518379
Mettl7a1	53.6934	44.6881	30.3222	59.4775	106.77	97.3503	-1.27512	8.13204e-06
Mettl7a3	1.59154	0.133672	0.376563	5.37731	11.1413	10.2648	-3.69984	3.00754e-08
Mfap2	4.05047	5.74123	6.68718	1.75497	2.29792	2.0644	1.53766	0.000375311
Mgat4a	61.0194	27.2146	29.6385	19.5106	82.6164	86.0773	-1.24404	4.87168e-05
Mgl2	0.792862	1.49201	0.246415	4.00154	5.57142	4.29715	-2.4521	6.69276e-06
Mgme1	3.29914	1.64691	3.58691	3.64448	5.79692	5.23563	-1.10032	0.000211563
Mgp	368.577	364.59	318.546	138.509	101.204	96.377	1.43966	5.67199e-09
Mir17hg	2.05695	3.47692	5.264	1.75294	0.713999	0.736894	1.77758	0.000879659
Mir703	129.037	177.993	223.473	66.9908	72.2095	94.8002	1.07091	0.0012666
Misp	149.575	145.473	162.205	282.838	237.752	269.322	-1.01853	8.66772e-07
Mlph	9.42897	7.6635	10.0635	22.8663	18.0144	20.6868	-1.33823	1.44499e-09
Mme	1.306	0.153524	0.198793	0.094373	0.172385	0.095675	1.98196	0.00900458
Mmp10	44.3296	6.15694	19.6085	2.04875	1.9523	0.43976	3.80272	1.78031e-05
Mmp12	1.38189	3.78896	5.74743	0.548923	0.521621	0.450998	2.8535	5.22699e-08
Mmp13	38.1773	7.83578	29.7421	4.02128	3.39739	1.79156	2.76986	1.68479e-09
Mmp3	47.5208	15.2369	52.0375	2.62976	0.911201	2.30159	4.19931	4.29107e-19
Mmp7	8.4066	37.229	25.0483	0	0	0	7.79021	1.74196e-06
Mmp8	24.3821	16.89	25.5003	0.042197	0.035255	0	8.749	1.58039e-41
Mmp9	5.89506	4.35228	6.38585	0.89388	0.878081	0.599645	2.7528	9.16814e-17
Mns1	1.14424	0.452037	0.506716	0.766453	0.567028	0.148123	2.33204	5.95593e-06
Mpeg1	24.3854	16.2883	17.7342	9.28606	8.85482	7.85533	1.02109	8.22332e-05
Mpp6	16.5217	54.0778	16.8417	10.591	11.067	10.7689	1.31021	0.00158941
Mptx1	40.3675	9.44795	30.5437	8212.3	10838.4	13657	-8.84878	6.80951e-121
Mptx2	0	0	0	16.7862	18.148	47.6304	-7.44288	1.29011e-07
Mpzl2	18.9343	11.1653	10.3553	21.0153	34.2882	23.4141	-1.09172	0.000337641
Mrap	0.763545	2.07604	3.01752	0.438503	0.129168	0.592482	2.11821	0.0092333
Mrgpra2b	0.761938	1.73444	0.624442	0	0	0	4.60007	0.00142254
Ms4a10	4.24061	4.93391	3.16051	1.20141	1.49316	1.75679	1.52299	0.00158795
Ms4a18	0.817326	4.63232	1.11883	0	0	0	7.0611	5.3934e-07
Ms4a4b	4.50642	4.55415	3.44093	1.34097	1.29695	1.3736	1.38037	0.00198217
Ms4a4c	6.3322	2.20336	5.0823	1.00421	0.741405	1.49495	1.82125	0.000678469
Ms4a5	0.997148	3.45394	1.20071	0.220664	0.514574	0.048918	2.61688	0.00124396
Ms4a6c	21.4066	18.5123	23.293	6.73136	6.12644	5.20123	1.86543	1.08238e-13
Ms4a6d	35.3166	27.0865	38.8369	11.26	5.67565	5.3885	1.87152	5.55899e-07
Msantd3	1.57868	1.00667	2.32694	4.60244	2.4653	2.55559	-1.45054	0.00670596
Msr1	5.34248	6.23161	5.43086	1.92434	1.69941	1.16252	1.77258	9.83857e-10
Msrb2	2.32851	2.94806	2.75803	4.88775	7.91759	5.00508	-1.31688	0.00279755
Mss51	0.592341	0.868882	0.92932	0.108583	0.158329	0.165062	1.99819	0.0028709
Mt1	1107.71	965.991	862.055	122.095	192.026	127.448	2.52586	2.80654e-26
Mt2	913.639	533.291	625.404	88.7163	56.9599	35.1315	3.27567	3.29992e-23
Mt4	4.0079	3.69269	3.9813	1.46876	0.497932	0	2.70143	0.00116406
Mthfd1l	3.98846	2.13202	2.54043	1.46828	1.16734	1.53816	1.15437	0.000403489
Mttp	1.24415	1.74279	1.17637	0.445737	0.582315	0.516375	1.13662	0.00254385
Muc2	210.358	381.741	872.204	214.533	134.865	209.602	1.16209	0.0054079
Mustn1	41.4364	20.9797	35.2092	60.1379	62.8732	56.8696	-1.05109	0.000194486
Mxd1	55.1198	60.6778	69.2292	134.282	129.083	132.366	-1.28996	1.76817e-11
Myef2	3.69766	2.6623	6.94923	4.46056	1.93863	3.69453	1.08512	6.12623e-06
Myl7	34.143	16.6099	42.2543	0.415423	0.413249	0.137899	6.73688	4.87515e-28
Myl9	254.189	187.53	503.604	525.773	624.981	530.915	-1.07915	0.000413973
Myo1b	10.6188	17.6129	14.2572	5.65908	5.82618	6.56099	1.07998	0.000183346
Myo1e	14.6122	6.24731	8.20965	37.4217	14.9675	17.292	-1.43224	0.000488502
Myot	3.62731	5.79202	2.66537	0.119278	0	0	6.20744	8.35656e-16
N4bp2l1	5.96989	6.06234	4.07886	1.72717	1.62995	2.96441	1.33508	0.00131486
Naaa	6.26565	6.14076	7.91956	10.7607	18.3708	13.9866	-1.3621	7.29289e-07
Naip5	10.8629	10.8968	14.2694	5.63822	5.07927	5.39365	1.13069	3.27486e-07
Nbea	0.787222	1.51323	1.47222	0.390912	0.356296	0.378504	1.2099	0.000427955
Ncf1	10.7125	10.6487	17.4656	3.8026	2.89053	4.07665	1.6339	1.28436e-08
Ncf4	9.78669	4.99263	6.87132	2.95181	2.53555	3.85073	1.3492	7.72802e-05
Nckap5	0.553248	0.710138	0.616846	0.284917	0.119966	0.271695	1.04565	0.00287821
Ndrg1	56.5439	199.223	170.247	33.74	50.8859	42.0424	1.54014	9.63359e-05
Ndrg2	54.4414	7.30787	33.7934	70.0523	112.318	76.3129	-1.40719	9.87249e-06
Neat1	63.3391	160.971	0.41017	57.5923	28.5466	0.715516	1.421	0.000475768
Negr1	0.435385	0.416808	0.596466	1.14269	1.31025	1.18619	-1.3006	0.000124093
Neo1	9.41749	4.97921	5.61287	19.3551	10.6168	14.5632	-1.14336	1.1397e-06
Neu3	1.74061	0.467425	0.758794	0.755108	4.20659	2.42796	-1.75283	0.00175085
Nfasc	0.444331	0.428969	0.707133	0.062725	0.098434	0.107237	1.80994	0.000201392
Nfe2	1.59496	0.624459	0.793924	0.143509	0.062418	0	4.08696	0.000161834
Nfil3	8.48389	9.69876	8.65804	2.25351	1.91882	2.36313	1.8538	2.21248e-09
Ngb	0.296429	0.764478	0.732803	2.50776	3.28383	2.34095	-2.51048	4.29396e-06
Ngp	3.94048	11.9664	37.3519	0.158939	0	0	7.48686	1.68933e-07
Nkg7	3.0498	7.12668	4.33672	0.531357	0.404319	0.65219	2.75263	2.39731e-06
Nlrc5	3.06104	3.21588	3.7178	0.313322	0.268083	0.300429	3.47378	1.6898e-24
Nlrp10	0.922693	0.478554	0.532687	1.70003	2.34336	2.50243	-2.17786	2.81463e-06
Nlrp1b	3.59206	2.76692	2.40515	4.24226	5.56428	5.77182	-1.03345	7.58113e-05
Nlrp3	0.936727	1.28323	2.16392	0.081421	0.081354	0.044377	4.60334	1.30233e-12
Nlrx1	5.42214	2.73958	5.19217	11.2175	8.18672	9.32509	-1.233	4.72232e-05
Nmb	1.9299	4.87634	1.573	0.699148	0.660181	1.23336	1.89845	0.00445198
Nmu	1.94519	2.33477	2.37472	12.0316	17.8843	13.7069	-3.36427	5.72019e-21
Nod2	1.13165	0.737864	1.04548	0.230547	0.097785	0.23649	2.64584	1.94422e-06
Nos2	9.53682	12.3408	26.8058	0.884138	0.078236	2.25487	3.78599	6.13117e-05
Npas2	2.97373	2.4397	1.56676	4.92979	4.10288	5.12355	-1.37329	4.37479e-05
Npc2	84.6098	34.1579	42.5079	91.7359	128.359	117.529	-1.21923	0.000103626
Npnt	1.03388	0.902776	2.92617	0.28155	0.585189	0.279083	1.95102	0.00140599
Nppc	2.55006	0.764625	0.407925	0	0	0.062332	5.16302	0.000219823
Npy2r	0.164695	1.66623	0.508588	0.185924	0.276431	0.129102	2.63657	0.00579038
Npy4r	0.959097	0.414153	1.19597	3.11166	2.14085	1.76287	-1.72426	0.00022628
Nr1d1	6.94796	2.96303	7.01829	26.5074	32.7221	29.4267	-2.12494	1.27198e-17
Nr3c2	8.77202	5.80436	4.61272	21.0941	14.7757	19.0979	-1.15917	1.21341e-07
Nrap	1.54261	0.369575	1.0513	2.54071	4.02461	4.08854	-1.11152	0.000211804
Nrde2	2.13532	1.00411	1.143	3.21363	3.43095	3.14006	-1.38439	0.000418033
Nt5c2	5.81363	3.42684	7.0249	3.39161	2.17935	2.86154	1.06849	0.000351435
Ntrk2	0.147332	1.48497	0.797877	0.076896	0.082711	0.163772	2.52319	0.000110522
Nts	4.08065	104.308	10.7107	0.806372	0.447399	0.537689	5.67307	9.98783e-06
Nupr1	356.273	725.325	935.24	222.16	137.507	152.829	1.76032	1.13501e-06
Nxnl2	1.14804	0.212522	0.879692	0.221296	0.181614	0.051673	3.21587	0.00540529
Nxpe2	7.97909	3.58807	23.4503	32.9969	60.3363	50.4776	-2.01795	1.68253e-05
Nxpe4	26.9447	0.720188	6.08875	55.9806	63.3428	47.93	-2.39276	5.91989e-07
Oas1a	30.1568	18.6013	22.8043	39.6084	41.6498	48.863	-1.13209	2.73236e-06
Oas1g	11.4711	6.53207	15.3844	24.1466	18.312	21.1794	-1.22011	2.79878e-05
Oas3	0.726125	0.605447	0.559371	2.15517	0.774187	0.878775	-1.3477	0.00662212
Odf3b	0	0.246255	0	1.95468	2.70095	2.06135	-3.12009	3.81032e-05
Ogn	41.1177	44.9801	32.9393	59.9845	86.3031	67.8489	-1.03716	3.9974e-05
Ogt	23.1054	48.5666	46.6091	9.88151	14.5873	12.4845	1.46265	2.51609e-06
Olfml3	22.6359	13.211	24.2024	8.13184	9.89301	6.11197	1.18058	0.000373671
Olfr1033	0.218095	0.43885	1.07896	0.207773	0.379984	0.043968	2.05857	3.10347e-06
Olfr56	0.675976	0.182032	0.171163	0.023369	0	0	2.26458	5.97667e-11
Olr1	0.53265	2.2827	1.76386	0.065953	0.018585	0.016838	5.65109	4.71261e-10
Ooep	0.73722	0.469716	0.305934	1.01448	0.883972	1.45577	-2.36832	0.00770801
Oosp1	1.70525	0.550896	0	0.084022	0	0	3.12742	0.00770879
Opn3	0.796754	0.381772	0.767871	1.89596	2.10133	1.54035	-1.58191	0.00528648
Optc	1.70713	1.83265	0.498768	6.82308	0.391737	0.427754	-1.77627	2.95532e-06
Orc1	4.2574	3.04243	2.88238	0.759777	1.73209	1.57197	1.0522	0.00617228
Orm1	1.74594	4.28852	1.98533	0.057093	0.295657	1.38427	2.78744	0.00383423
Orm2	1.0893	2.04456	1.31395	0	0	0	6.6587	1.11638e-05
Orm3	0.203297	1.45296	0.301844	0	0	0	7.10835	3.89414e-06
Osbpl6	1.40588	0.666659	0.932501	1.55482	2.10816	2.26868	-1.00901	0.00341289
Osm	3.49457	8.53318	5.16379	0.160557	0.114795	0.341677	5.00365	1.39719e-17
Osmr	10.1862	5.73433	7.77101	3.20659	2.52465	1.87065	1.63066	1.1388e-06
Osr2	0.225634	36.4932	13.134	0.073834	0.396719	0.627452	5.74902	0.00041255
Otub1	27.89	20.3507	22.5398	39.0771	52.6788	42.5823	-1.17331	3.91162e-07
Oxct1	86.1194	51.3259	60.7215	121.499	126.546	117.061	-1.08105	9.3693e-06
P2ry2	4.43732	3.32165	4.72715	11.4546	5.39227	5.20575	-1.14875	0.00337622
Pacsin1	0.18874	0.64095	0.933335	0.314276	0.388255	0.120019	1.83246	0.000907359
Padi2	0.34082	1.12241	1.18716	0.263582	0.203357	0.144716	1.91563	0.00065598
Padi4	0.480462	0.239531	1.18691	0.025171	0.062266	0.01756	2.62734	0.00612619
Pak6	0.414091	0.485797	0.523046	0.049299	0.172101	0.152192	2.5854	8.27981e-05
Pamr1	3.34597	2.69996	3.67803	9.37294	10.5804	9.89504	-1.92108	1.9547e-14
Pappa	1.68553	0.823246	0.521357	0.379975	0.276471	0.234088	1.6038	9.1271e-05
Pappa2	1.77921	1.90758	1.73266	0.529644	0.533067	0.553652	1.43956	3.08228e-07
Pbp2	0.181608	0.725658	1.36944	0	0.045421	0	6.46284	9.31147e-05
Pcp4l1	34.8738	24.7663	35.6252	64.4881	71.6625	61.4212	-1.25151	1.68242e-10
Pcsk6	1.53615	0.617476	0.712694	3.93608	4.17605	3.9031	-2.37638	0.000224463
Pcsk9	5.70104	8.52308	15.8812	2.97605	2.04488	2.90218	1.71249	1.26273e-05
Pcx	14.6997	2.92961	6.33832	20.2913	17.0466	23.6705	-1.25898	0.000524625
Pde1c	0.206158	0.471678	0.840132	0.123134	0.074507	0.067748	1.54588	0.00391121
Pde6a	0.065091	0.027703	0	0.390982	0.290505	0.413171	-3.15532	8.26608e-10
Pde7a	14.4327	5.44057	1.34856	13.4146	21.8036	18.7638	-1.21285	0.000978547
Pde8b	2.54051	6.53578	3.58708	1.45704	1.82417	2.08522	1.18879	0.00453738
Pdgfd	1.27102	0.924544	1.58601	2.17206	2.51231	1.63902	-1.23159	0.00140363
Pdk2	6.59225	7.33373	6.56002	6.55345	13.537	15.8891	-1.02384	0.00236451
Pdp2	1.56164	0.441779	1.07521	2.36916	5.85489	6.79551	-2.04273	1.82833e-06
Pdpn	29.2889	14.9041	17.1898	10.1288	9.02568	7.18583	1.07799	0.00117362
Pdzk1ip1	135.691	74.6613	65.9381	154.691	193.668	239.638	-1.38967	2.99693e-06
Per2	4.62038	5.64009	6.68853	1.45728	1.15454	2.01936	1.64925	8.61638e-09
Pf4	17.4252	14.7217	13.1207	42.077	30.0415	20.6035	-1.09656	0.0015446
Pgf	1.01103	0.837655	2.23386	0.422261	0.158002	0.241256	2.43327	0.00308683
Phf11b	5.47799	14.7848	16.2646	2.13331	1.5762	2.08051	2.2512	4.71212e-08
Phf11c	2.39498	2.76812	3.4378	0.514186	0.352262	0.529897	2.57926	1.34671e-07
Phf11d	3.55633	6.55926	5.8889	1.18166	1.89624	1.6369	1.35538	5.78377e-05
Phf21b	1.33756	1.07921	1.71508	0.325525	0.605294	0.815278	1.22356	0.00203402
Phlda2	2.11198	0.865243	2.62699	15.8251	5.57854	5.17724	-2.14233	0.000353447
Phlpp1	3.05123	1.69254	1.70863	4.07393	3.64768	4.50188	-1.14645	0.000392116
Phlpp2	7.91031	3.39989	3.15123	13.5968	8.85088	9.98515	-1.45843	0.000102733
Pi15	2.80101	1.83511	1.33611	0.30191	0.300223	0.20346	3.25767	2.04498e-14
Pibf1	4.90008	29.5652	15.1083	2.75181	3.82664	2.86192	2.27813	4.17567e-06
Pik3cd	3.34932	1.33895	2.6703	0.65075	0.793229	1.09209	1.28909	0.00104888
Pik3r6	0.561232	0.363877	0.650615	0.250349	0.136811	0.169554	2.04107	0.00124779
Pilra	5.15799	4.17598	7.67437	0.735924	0.965378	0.689677	2.44218	1.71101e-13
Pilrb1	2.80732	2.40394	4.45322	0.862202	0.912771	1.16513	1.83735	0.00105977
Pilrb2	2.26494	2.21297	2.26964	0.559157	0.490701	0.588099	1.67462	1.43774e-05
Pim1	13.9889	8.86819	10.4964	5.64022	4.94451	5.91564	1.14255	2.04736e-05
Pirb	9.45085	7.87962	11.6101	1.47177	0.778493	1.1038	2.93506	3.72053e-13
Pitx1	3.80964	2.11112	1.03518	6.17815	7.97916	6.6234	-1.88113	1.02716e-08
Pkib	0.559478	0.54235	0.63543	0.184322	0.153662	0.229856	1.37381	0.00688907
Pkp3	23.8863	14.4975	23.1784	44.2636	27.7335	27.1285	-1.00297	0.000878488
Pla1a	13.1844	2.26681	7.89315	1.52907	1.59663	1.92861	1.84339	0.000326851
Pla2g2a	91.1599	4.49854	40.8643	8.22391	2.5388	5.70135	3.11481	0.00503787
Pla2g2d	0.704608	0.033093	0	0.925005	0.626459	1.00684	-2.40751	0.00241267
Pla2g3	3.02878	2.0262	2.31802	11.2858	6.89211	8.66282	-1.07954	4.71083e-06
Plac9a	171.305	178.669	149.643	132.272	107.375	139.556	3.66773	0.00680939
Plbd1	25.0525	8.52705	5.99733	44.6231	52.7626	59.9871	-2.20727	1.84102e-07
Plce1	4.72916	4.07178	5.06731	10.2589	7.06631	9.04566	-1.1768	1.82758e-06
Plec	6.96958	4.01551	8.09176	23.9388	8.97867	9.70767	-1.44884	0.00027818
Plek	10.6849	20.5259	19.628	3.23114	2.03065	2.456	2.73459	8.01587e-15
Plekhg6	1.92754	1.51779	2.19525	3.91774	2.35324	4.53563	-1.11256	0.00227078
Plet1	68.2571	129.196	303.876	5.51695	1.51884	2.54752	5.41558	6.77468e-12
Plin1	0	0.025887	0	0.403344	0.375791	0.630934	-3.59966	0.000559828
Plk3	6.1713	6.37821	8.41075	16.5121	14.5117	11.6221	-1.21376	1.10318e-05
Plxnc1	0.912106	0.268725	0.803791	0.274878	0.180787	0.212585	1.60963	0.00227195
Pmp22	188.062	135.901	172.278	939.728	504.54	372.525	-2.10269	1.06171e-09
Pnliprp2	6.56549	17.5864	5.00371	2.84519	2.26631	2.96986	1.78598	0.000740228
Polq	0.705165	0.179403	0.669652	0.138937	0.206527	0.165011	1.34596	0.00803562
Ppara	0.537779	6.72131	2.30457	0.422843	1.06123	1.03896	2.08498	0.0026315
Ppard	20.4162	10.6124	15.6719	32.0214	25.6674	39.9308	-1.22416	9.98061e-06
Ppbp	4.73552	0	1.20796	0.525593	0.053871	0.136329	3.4202	0.00956799
Ppm1j	6.94036	4.12469	9.61296	16.0833	12.0471	15.1499	-1.37411	7.67916e-05
Ppm1k	2.54888	2.25611	2.83857	0.479195	1.38844	1.34786	1.29857	0.00172035
Ppp1r14a	55.7169	58.8922	74.6042	106.54	167.121	158.805	-1.45991	1.32095e-08
Ppp1r1a	0	0.374446	0.796683	1.02468	2.32556	1.41664	-2.99	0.000546646
Ppp3cc	5.62206	4.87389	5.0512	1.82783	2.28885	2.51962	1.07077	0.000304193
Prap1	2.58684	212.761	46.5297	1.89424	0.811275	0.670746	5.87382	4.28977e-05
Prdm6	0.115652	0.194645	0.464326	0.39963	0.850556	0.878786	-2.49557	0.000184513
Prdx6	879.298	251.136	118.31	547.604	639.698	757.339	-1.82635	2.36208e-06
Prex1	4.63727	4.52168	4.56802	0.848653	0.811642	1.15153	2.00568	3.47584e-15
Prkg2	0.336579	15.4936	4.46711	0.026723	0.104226	0.09908	5.97218	0.000420997
Prl2a1	0.959768	1.01755	1.00118	0	0	0	5.06137	0.00171142
Prmt2	4.01414	3.05594	3.98227	5.19801	8.50506	7.7788	-1.12824	0.000197284
Prok2	0.882164	0.28536	0.792009	0	0	0	4.72727	0.00177305
Prom1	92.0804	137.751	134.606	64.56	46.4018	48.5903	1.03214	8.46985e-05
Prpsap1	19.3529	46.6809	38.9259	11.4857	18.5035	19.9182	1.02618	0.00485371
Prrx1	0.308884	0.584193	0.412604	0.053546	0.150908	0.06109	2.42782	0.00178019
Prss16	1.48693	1.00349	2.50486	0.108906	0.230173	0.399873	3.1142	2.22549e-07
Prss22	1.60877	3.50912	2.00098	0.186665	0	0	4.53771	3.35589e-06
Prss27	3.64762	2.07662	1.15087	0.288276	0.184418	0.316633	3.2016	1.09227e-05
Psmb8	136.112	138.668	97.4428	48.4377	40.2333	48.5977	1.21581	2.20869e-06
Psmb9	144.762	135.528	103.465	30.4893	34.4886	38.9421	1.71847	9.54388e-15
Psme1	218.246	260.678	224.978	82.7908	113.46	118.939	1.06637	3.27158e-06
Pstpip1	5.20887	1.76664	3.39445	1.35093	0.880347	1.51157	1.35852	0.00441883
Pstpip2	1.46568	4.84977	4.01119	1.18581	1.17566	1.09499	1.94292	0.00143942
Ptafr	0.956564	1.07401	0.97349	0.544166	0.637976	0.470683	1.35717	0.000281363
Ptgs2	9.65623	14.7868	24.9569	3.7341	1.90621	1.25607	2.72959	2.06734e-10
Ptn	6.35467	3.51328	6.55257	15.2338	16.4198	14.1128	-1.43364	1.45486e-06
Ptpn22	2.14822	1.93226	1.40609	0.530476	0.28543	0.52906	2.13815	6.17697e-06
Ptpn3	6.78284	5.00402	6.32896	12.5156	11.4924	13.0353	-1.29474	2.93744e-08
Ptprc	3.06432	2.02337	2.17832	2.12991	1.03877	2.01266	1.33235	2.42718e-05
Ptpro	2.67296	2.33404	5.66111	1.68521	1.39607	1.25209	1.20958	0.000859035
Ptprz1	0.624877	0.207768	0.697545	1.57859	1.70267	1.69238	-2.14342	3.66973e-08
Ptx3	5.54507	2.27496	4.88729	0.275126	0.179035	0.092118	5.72767	2.88163e-15
Puf60	34.78	18.3319	30.3398	44.6392	53.6093	52.5184	-1.04397	4.56886e-05
Pygl	8.04457	7.0836	9.59133	2.50007	3.5409	2.85145	1.36046	1.39804e-07
Pygm	0.773689	0.546534	1.6353	1.49276	2.29593	2.35047	-1.21923	0.00276766
Qpct	4.34234	4.50774	6.97625	10.5575	10.7641	7.69921	-1.30499	6.55405e-06
Rab24	23.3991	34.3957	39.4998	13.4711	14.8532	16.6051	1.02329	9.53194e-05
Rab25	129.247	48.8069	70.1326	143.504	164.928	171.937	-1.18728	0.000162558
Rab26os	12.4421	18.1785	20.2926	5.00501	6.62043	7.03051	1.25389	0.00185909
Rab27a	6.32106	4.30389	10.6557	23.229	23.9143	21.8245	-1.20749	1.531e-07
Rab33a	0.184814	0.61576	0	2.21341	3.08397	1.02446	-3.22669	0.000105174
Rab37	3.43315	9.69147	6.27196	1.57502	2.23196	2.55016	1.80803	5.64229e-07
Rab3b	0.624887	0.564937	0.888263	8.08144	6.04612	3.97178	-3.74777	1.71529e-24
Rab44	0.37125	0.303651	0.844026	0.032375	0.013953	0	2.45405	0.000482784
Rab7b	1.50789	1.47775	1.6021	5.94385	3.3126	3.00305	-1.50143	0.000978103
Rac2	13.3388	8.30182	8.64261	3.50932	2.28764	4.18134	1.44667	2.38921e-05
Ralgapa2	5.94654	11.9899	10.3877	3.99323	3.56713	4.41667	1.01316	0.000823067
Rap1gap2	12.3876	9.26226	9.47497	27.5726	17.6673	18.5425	-1.25523	8.89925e-06
Rapgefl1	5.71684	2.6092	3.93199	6.02755	12.9074	11.4156	-1.35567	6.87772e-05
Rasef	17.3478	15.6913	14.8724	42.6746	29.512	22.9373	-1.17666	9.96708e-05
Rasgef1b	8.08793	3.83033	4.75335	11.1986	21.6252	12.6302	-1.63702	5.53218e-06
Rasgrf2	0.410553	2.68972	1.82656	0.399924	0.446332	0.5784	1.49583	0.00741958
Rasgrp1	1.04244	0.752905	0.782256	0.299134	0.225853	0.405318	1.34356	0.00110108
Rasl11a	13.7629	3.25169	6.69939	0.906328	1.91121	2.35243	2.0085	0.000420268
Rasl12	2.67514	0.824798	2.37593	3.85279	3.45608	2.96336	1.7494	0.000407076
Rassf4	1.78537	4.79813	4.11296	0.805895	0.850694	0.92222	1.72949	4.98335e-05
Rbm12b1	2.14287	7.48053	2.75501	1.34419	1.59127	1.18482	1.78678	0.00145906
Rbm19	1.46834	0.5625	1.59157	2.66314	2.32078	1.50002	-1.21298	0.00647368
Rbp1	14.342	8.22879	18.5824	2.3724	2.88406	2.96076	2.17138	9.35546e-13
Rbp7	4.54441	3.2548	6.04149	8.84414	7.36191	8.36727	-1.08798	0.00612735
Rcan2	0.846346	0.4637	0.503006	2.42512	2.21128	1.41233	-1.93728	2.71061e-07
Rdh12	2.14234	5.3414	3.62575	0.573907	1.14018	0.730111	2.21569	6.32182e-05
Rdh16	16.9893	4.24617	6.60894	23.1602	14.0919	23.5229	-1.43416	0.000707591
Reep2	0.747463	0.261875	0.293382	1.24108	0.945149	0.853746	-1.80313	0.00174385
Reg1	3.17245	1.7226	1.42128	0	0	0	7.91526	5.24674e-09
Reg3a	0.87676	5.55914	0.464203	0	0	0	7.84072	8.58826e-07
Reg3b	522.611	20718.9	9446.7	57.719	15.4078	16.965	8.21249	6.58277e-14
Reg3g	93.9147	1088.64	838.81	8.05357	2.21124	2.61696	7.07524	8.83071e-11
Relt	1.53869	0.400661	1.01212	0.232534	0.118778	0.589805	1.81232	0.00564679
Rep15	94.226	66.4611	49.6718	127.321	156.579	113.193	-1.12338	3.26434e-05
Retn	0.840403	0.136569	0	5.01487	2.94966	4.19746	-3.31491	9.58957e-06
Retnla	0	0.549971	0	28.6383	32.0377	34.9383	-8.31857	7.53573e-21
Retnlb	574.047	4023.35	5414.68	88.2084	65.9819	218.105	4.54967	1.75122e-06
Retnlg	185.881	224.364	221.054	2.14215	0.485165	0.748347	7.57809	1.76614e-15
Retsat	16.9186	16.0612	14.5268	28.0061	37.5319	35.9463	-1.03023	9.79259e-07
Rgs2	12.1584	65.3917	43.0193	12.1769	18.2801	11.8462	1.37716	0.0035378
Rgs4	13.6284	8.62756	12.1409	4.22387	4.87575	3.64645	1.25113	7.75402e-06
Rhbdl3	0.648951	1.2737	1.75682	0.242213	0.581258	0.471357	1.53848	0.00250713
Rhob	72.8167	61.0731	78.2964	169.269	117.907	210.473	-1.37593	2.21735e-07
Rhoc	196.114	126.233	186.739	314.508	344.339	342.674	-1.19555	2.39869e-09
Ric3	0.450998	0.426473	0.651877	0.90537	1.12202	0.825947	-1.21102	0.00572096
Rilpl2	26.146	18.1666	22.4668	4.5854	9.17687	10.8943	1.38174	4.7835e-05
Rimkla	0.680498	0.835226	0.893638	0.243947	0.18445	0.236832	1.73855	0.00187378
Rims1	0.735915	1.01014	1.52203	1.73112	1.84997	1.93916	-1.05988	1.09925e-05
Rims4	0	0	0	0.839898	2.34793	2.01246	-3.15253	4.83457e-08
Ripk2	12.4338	6.87561	8.15863	3.849	4.0691	4.45557	1.06945	0.000147639
Ripply1	0.277521	1.62056	1.51555	0	0.085353	0	3.66509	0.00296399
Rnd1	3.96302	3.29385	5.07195	0.482502	0.215851	0.310247	3.69529	5.02381e-14
Rnf149	29.2041	26.0712	22.1468	29.5688	34.4595	32.2669	-1.13626	0.000460206
Rnf157	0.426019	0.273663	0.42298	0.434824	0.299237	0.376077	1.20243	0.000388108
Rpgr	2.54179	4.46101	2.55999	1.38853	1.42152	1.43632	1.21269	0.000113425
Rph3al	5.27249	12.4712	12.6347	3.20284	5.56794	5.40685	1.05966	0.00253885
Rps16	788.181	356.018	519.834	785.796	1133.85	1009.39	-1.00496	0.000566467
Rps4l	10.9489	16.0625	8.11783	11.8337	23.1881	38.5206	-1.2079	0.00569935
Rrm2	13.3645	8.73784	13.149	3.29901	3.37678	3.56615	1.81415	6.2657e-12
Rrp9	7.58482	5.95305	7.7246	13.2463	11.2295	9.41019	-1.18329	1.92031e-05
S100a16	428.84	128.096	215.007	699.338	377.424	347.914	-1.17016	0.00501629
S100a8	2256.09	3837	3593.36	15.3451	4.06743	8.34514	8.33903	8.57956e-103
S100a9	1615.92	2880.26	2849.59	11.7724	1.98692	5.41498	8.46323	2.91772e-27
S100b	0.937988	1.11011	1.92936	2.14741	2.60622	2.56102	-1.26056	0.00478077
Saa1	3432.12	1769.36	1114.35	4274.92	3381.71	5305.72	-1.21306	0.00134633
Saa3	799.835	1100.39	1548.91	8.86463	1.65099	6.39409	7.27021	3.37552e-22
Samd4b	5.49775	4.0926	5.54388	6.27477	4.71754	5.3143	-3.31612	9.92935e-27
Samd5	0.431471	0.226814	0.434855	0.16523	0.124199	0.135811	1.62341	4.21286e-05
Samsn1	5.33093	7.63956	5.36701	1.20115	1.30788	1.38181	2.00311	8.68192e-07
Scara5	8.71465	13.8599	8.71769	3.43381	3.64827	2.86214	1.50223	2.90711e-07
Scarf2	3.41991	4.46838	7.04603	1.86721	2.68106	2.47898	1.02987	0.00182207
Sccpdh	14.3556	24.2535	24.0852	7.00155	8.59575	5.36458	1.46196	4.10214e-06
Scel	2.04204	0.409722	0.348232	5.21303	3.24409	2.40204	-1.78816	0.00492932
Scgb2b20	7.60015	2.89172	13.6835	0	0	0	5.67706	3.24424e-07
Scgb3a1	1.31934	4.82586	4.28649	0.499585	0.298861	0	2.44506	0.00338745
Scin	29.3124	34.5144	21.7508	106.595	75.1743	82.373	-2.11706	2.22864e-15
Scnn1a	16.5404	8.53503	14.4152	44.524	26.0196	37.4473	-1.70517	1.69978e-07
Scx	0.735808	0.095246	0.699673	2.37873	2.25469	2.09754	-2.89764	0.000265151
Sectm1a	6.75931	5.94715	5.64234	13.276	15.3386	12.7705	-1.38093	2.50652e-09
Sectm1b	78.7814	90.1018	59.4061	136.997	137.263	157.299	-1.03547	6.12369e-05
Sell	7.7837	5.40785	6.5093	0.834101	0.792768	1.84766	2.2136	6.69822e-07
Selp	9.37756	1.99233	6.84273	0.72773	0.498497	0.470478	3.40196	1.61338e-11
Sema6a	2.74749	2.14585	2.15326	5.75016	4.00778	3.64028	-1.04954	0.00111384
Sema7a	5.15965	3.35776	5.37369	2.76407	1.29988	1.02512	1.27758	0.00171088
Serpina3c	1.56835	1.9898	1.23483	0.597188	0.800453	0.342943	1.43243	0.00551099
Serpina3f	17.0322	3.66034	5.20467	0.055447	0.026013	0.104904	6.0252	1.51868e-19
Serpina3g	64.4767	13.0069	18.2472	3.77872	2.45463	2.81051	3.23395	1.09233e-10
Serpina3i	2.49731	1.09293	1.87464	0	0	0.04627	4.74138	3.6078e-09
Serpina3m	17.0444	16.9117	11.8433	0.634402	0.08247	0.185367	5.04494	8.35367e-24
Serpina3n	286.663	117.46	191.317	17.5762	13.4264	12.7205	3.55353	2.9174e-28
Serpina9	0.329187	0.081909	0	0.830437	2.07101	2.40369	-3.4508	8.71126e-06
Serpine2	40.3541	14.0648	34.7974	9.02659	9.1442	7.55978	1.57082	9.60625e-06
Sertad4	0.553954	0.45428	2.00788	2.4018	1.42258	1.68566	-1.39585	0.00662842
Sfn	91.5147	98.6409	97.7558	349.159	102.528	123.215	-1.20388	0.00466105
Sfrp1	47.7322	14.4907	38.0445	8.78811	8.98991	8.91111	1.7677	2.95629e-07
Sh3bgr	27.0451	9.67928	16.4011	47.9833	53.6795	41.5314	-1.58137	2.08565e-06
Sh3d21	16.0074	2.37828	7.90068	25.4583	32.3279	25.2907	-2.00739	3.53998e-05
Sidt1	6.84999	7.65635	10.9664	2.74567	2.65828	2.98821	1.2124	2.85248e-06
Siglece	2.00997	0.654787	2.59622	0.479365	0.136762	0.185374	2.52016	0.00018896
Siglech	0	0.041123	0	0.299934	0.672368	0.217874	-6.66298	1.21338e-05
Sirpb1a	1.29637	0.761311	2.53635	0.152856	0.086867	0.063225	3.03883	1.60856e-05
Sirpb1b	4.42127	2.63422	3.56244	0.203671	0.02623	0.082833	4.13813	4.60657e-12
Sis	0	1.04173	0.301132	0	0.048321	0.015312	2.58794	0.00760087
Sla	5.76148	3.39112	0.424874	1.58715	1.49956	1.86953	1.39667	3.66828e-05
Slc10a2	6.30848	62.3934	14.1155	2.05373	1.48978	1.60945	4.35058	5.02507e-06
Slc11a1	2.4449	3.77508	4.99392	1.79393	1.7011	1.5258	1.45181	0.000108398
Slc13a1	0.459521	18.8226	9.01282	0.123538	0.251399	0.258282	5.28344	4.54348e-05
Slc15a1	12.7919	1.21433	1.85123	64.3904	70.4076	65.3107	-3.93648	0.000111521
Slc15a3	8.12615	6.70552	6.44677	1.34122	1.27712	1.14948	2.00996	4.38219e-12
Slc16a12	0.613194	0.481945	0.296211	1.33317	2.41258	2.181	-2.37914	2.19892e-09
Slc16a2	1.42129	1.88828	2.24098	0.645494	0.336229	0.410232	1.78907	2.15823e-05
Slc16a4	0.295135	0.257036	0.548022	0.225545	0.276383	0.099135	1.85552	1.42922e-05
Slc17a4	11.9915	26.9241	16.9652	4.5333	7.90858	7.51398	1.39012	0.00020595
Slc19a1	4.00486	7.6675	4.91287	1.93894	3.88046	3.59435	1.5561	4.15618e-06
Slc1a1	7.80169	1.1866	2.97457	6.6499	11.1578	8.96856	-1.31116	0.00804953
Slc20a1	26.1136	23.5628	27.3371	88.5088	135.669	166.219	-2.48943	1.53742e-24
Slc25a20	63.1724	113.206	74.7226	134.438	167.304	168.878	-1.08067	0.000142064
Slc25a37	6.07418	9.79112	10.9316	2.80648	3.20835	3.33242	1.30537	7.98937e-06
Slc26a10	0.035145	0.48283	0.65266	0	0	0.023045	2.09266	1.69243e-08
Slc26a2	31.5192	22.961	23.5342	67.381	63.4608	95.3137	-1.4849	1.19753e-09
Slc26a3	178.99	179.466	182.55	927.205	500.478	718.137	-2.16208	2.39539e-14
Slc27a2	1.58046	3.971	4.06423	0.955226	1.21627	1.36811	1.30821	0.00114831
Slc28a2	1.58536	2.4262	2.28325	0.444535	0.124172	0.842384	2.03317	0.00149536
Slc29a1	11.8872	8.86702	14.2286	17.7318	20.1645	19.7132	-1.00744	3.11413e-05
Slc2a6	2.76261	2.72783	3.78831	0.947348	0.78334	1.14405	1.57568	4.34591e-05
Slc34a2	0.779609	1.23694	0	12.9355	9.47898	18.4925	-4.53615	7.74983e-05
Slc35d1	2.38756	16.7499	8.97019	3.52514	3.50046	2.88881	1.65759	0.000737393
Slc35e2	2.01478	2.59179	3.13304	1.05151	1.54952	1.38597	1.05172	0.000409609
Slc36a1	7.75546	4.58398	4.73587	17.7831	16.2497	36.3348	-2.30051	9.78359e-11
Slc36a2	0.670976	0.214276	0.527886	0.107131	0.136707	0.04502	2.92638	0.00694649
Slc37a2	2.41338	6.07045	0.983472	94.3008	122.005	139.609	-3.29562	6.61084e-33
Slc38a6	1.48226	2.57728	3.43534	0.541733	1.15312	1.05313	1.13023	0.00338339
Slc38a9	0.665554	1.63122	1.28838	0.278232	0.580936	0.412448	1.46531	0.000501106
Slc39a14	8.76812	6.7991	0.805705	2.59302	0.31693	0.409109	1.48003	1.12048e-11
Slc39a8	6.58967	24.2927	21.0574	4.99567	6.47695	7.35877	1.2551	0.00265632
Slc3a1	4.76728	48.1018	25.8169	1.26125	0.889399	0.999838	2.36033	2.45442e-07
Slc46a3	4.66073	13.7994	6.14536	3.14738	2.4367	4.25825	1.10109	0.00881499
Slc47a1	0.191006	1.14711	0.469293	0.068018	0.066265	0	3.12249	0.000795436
Slc51a	0	101.164	24.379	0.128948	0	0	2.68905	0.00171578
Slc5a6	4.62423	1.77126	2.52257	2.37166	7.09804	7.82384	-1.03078	0.00580258
Slc5a8	45.6014	32.5971	38.531	46.0501	81.6528	82.8865	-1.11046	1.60505e-05
Slc5a9	5.05642	3.82935	4.87013	1.67019	0.931451	2.23855	1.33024	0.000414775
Slc6a4	4.29814	1.57324	1.34849	3.87582	7.69228	9.67834	-1.66013	0.000654309
Slc6a7	0.361156	0.486678	0.90505	0	0.258654	0.174391	2.29641	0.00342561
Slc6a8	83.9778	35.5937	61.0344	111.612	94.5561	151.069	-1.22206	8.69132e-05
Slc7a2	0.483645	1.17841	0.842053	0.093458	0.212104	0.202055	2.27752	2.74277e-06
Slc7a9	9.71647	8.41322	2.84353	2.61071	3.40682	3.20248	1.22094	0.00645826
Slc8b1	16.8567	4.3478	9.37302	15.9333	22.073	21.3543	-1.25601	0.00140443
Slc9a3r2	5.7796	4.5247	8.43179	11.189	9.66115	10.3465	-1.09334	3.4764e-05
Slc9a4	0.342972	0.604138	0.261975	0.049283	0.007641	0	3.43145	0.000621317
Slco4a1	0.99829	1.20139	1.92672	0.498618	0.317511	0.362978	1.65387	0.0012776
Slfn1	4.694	4.13911	3.22966	0.128409	0	0.335069	5.23843	7.98938e-16
Slfn4	17.2926	22.6299	32.2513	8.6383	6.40289	5.84341	1.61109	2.40251e-07
Slit3	4.70062	2.95792	5.92755	1.8214	1.35103	0.920093	1.56379	3.04223e-05
Sln	1.37629	0	0	5.01032	10.7294	7.11949	-4.28891	2.87401e-07
Smad9	0.162397	0.275021	0.200052	0.407786	0.600188	0.642864	-1.61097	0.00313403
Smim24	226.407	228.485	173.504	290.192	382.284	475.681	-1.02316	2.13308e-05
Smim3	18.7309	13.997	17.6417	7.88175	3.68509	2.96383	1.54538	7.04077e-05
Smkr-ps	0.667422	0.922422	0.995144	0.215648	0.221281	0.261326	5.6955	0.00103463
Smoc1	4.06747	2.1116	2.55878	0.6098	0.648332	0.379301	2.18866	4.79521e-08
Smpdl3b	8.52863	9.61842	9.28928	3.52247	3.31146	3.33079	1.32084	7.78289e-06
Smpx	2.79986	2.0753	1.76614	17.1986	23.0007	17.0809	-3.38197	2.00445e-15
Smtn	19.4757	14.2689	52.6441	61.614	57.379	46.4192	-1.18839	0.00299937
Snhg20	16.7039	37.2352	44.8391	5.75222	6.70365	9.86766	1.99088	1.3828e-06
Snx10	20.9424	18.315	17.575	6.18481	6.14914	7.55466	1.4122	2.7548e-09
Snx20	15.1472	16.9264	15.0623	6.7534	4.77667	6.99184	1.19035	2.7905e-05
Soat2	1.35888	1.72997	1.27805	0.410657	0.208475	0.23092	2.33736	7.14238e-05
Socs1	8.59242	8.35328	13.939	3.58722	3.15632	3.89302	1.39089	0.000133609
Sord	27.2544	26.2578	26.7465	44.0603	77.5631	67.4469	-1.23156	3.5197e-07
Sox17	0.946008	0.575328	1.28956	0.151859	0.417243	0.453258	1.37057	0.00758004
Sox6	0.84429	1.46725	0.983405	0.452829	0.30658	0.327538	1.40526	0.000191212
Sp140	6.20952	3.25327	6.98621	1.9276	2.49467	2.25347	1.22815	0.000261446
Spaca6	0.170648	0.062101	1.11618	0.208381	0	0.252075	1.49388	0.00931794
Spdef	27.1845	75.814	89.3833	28.2291	29.632	24.4664	1.00061	0.00847036
Spdya	0.37443	0.590982	1.00692	0.106874	0.211569	0	1.42862	0.00293801
Spink4	5348.76	5242.7	7097.81	2112.87	1615.65	2050.61	1.37519	1.75737e-09
Spon1	8.7525	4.58545	6.57542	2.09424	2.11685	1.77852	1.52765	7.45567e-08
Spp1	13.6915	16.8523	28.223	1.2116	0.295181	0.268496	4.76046	5.26531e-27
Sprr2a2	49.3188	50.8455	59.703	100.779	75.2723	75.2926	-1.51276	1.15558e-09
Sprr2a3	1659.13	867.902	1007	2985.65	1895.86	2011.41	-1.24673	0.000166198
Sprr2b	6.31543	5.06495	6.86458	14.7133	10.2204	18.3957	-1.20081	0.00120828
Sprr2d	1.83102	0.619858	0.193656	0	0	0	5.6603	0.00238181
Sprr2i	0.119317	2.71581	0.20059	0	0	0	5.85353	0.00767617
Sptbn2	0.233486	0.106408	0.223349	1.34816	0.676235	1.21135	-1.78285	2.76291e-06
Sptssb	60.9158	541.193	310.226	5.97362	3.51259	8.06678	5.46684	7.51285e-10
Sqstm1	135.748	105.691	122.334	259.956	188.13	208.951	-1.04683	6.49444e-06
Srd5a2	14.8008	4.07162	5.4736	24.8617	16.255	12.5168	-1.28132	0.00375927
Srgn	173.893	242.323	205.61	32.8846	29.3237	31.9301	2.55313	1.32666e-25
St3gal1	3.97012	5.1626	4.35144	2.33761	0.729451	0.956081	1.63664	0.00027846
St3gal4	57.3857	36.3621	67.5049	239.393	330.944	326.183	-2.63015	4.53686e-23
St3gal6	100.44	15.0653	42.3551	129.075	168.555	156.367	-1.68142	0.000185081
St8sia5	0.093826	0	0	11.6668	11.774	17.9605	-7.23383	2.8664e-34
Stat1	25.9091	18.9681	21.2385	7.33031	8.02028	8.81469	1.52316	7.52005e-09
Stat2	12.3328	9.18679	13.1422	4.10234	3.59373	5.93841	1.14856	0.000144571
Stc1	1.59557	0.415211	1.99658	0.848695	0.442151	0.343109	1.80149	0.00166027
Steap4	19.3932	12.23	10.3357	2.45567	1.1625	2.20133	2.6346	9.9733e-14
Stfa1	18.1355	42.4417	46.7191	0.158972	0.187391	0.399791	6.50568	3.73584e-20
Stfa2	16.3374	33.1686	45.4582	0	0	0	9.32327	1.61881e-13
Stfa2l1	23.9366	46.616	34.5853	0	0	0	8.50322	6.11171e-15
Stfa3	9.62181	16.7543	24.7878	0	0	0	8.04215	4.8137e-10
Stim1	18.0286	5.61736	9.30796	34.026	27.5748	31.1707	-1.3691	2.26729e-06
Stk26	0.3817	0.498096	0.505533	2.40807	1.61957	1.48161	-1.27966	3.33061e-05
Stom	60.8687	13.3433	35.1953	166.547	66.6448	96.9043	-1.87483	5.2663e-05
Stra6l	1.08015	8.36857	4.8716	1.0896	1.75363	1.44067	1.49406	0.006453
Strip2	1.16756	0.496842	0.967694	1.30553	1.74687	1.49678	-1.21093	0.00122465
Stx11	3.96537	3.50374	2.53348	0.872835	0.678225	0.437773	2.02723	3.6466e-06
Stx17	6.65968	12.859	12.9114	4.21704	5.29042	4.91536	1.01719	0.000762381
Sulf1	8.84069	2.42429	6.89673	2.99484	1.96681	1.82391	1.36836	0.000788185
Sulf2	14.789	8.585	15.1024	6.12699	5.24537	4.67337	1.23413	1.75389e-06
Sult2b1	11.8782	19.0091	23.633	30.4166	34.7063	34.2372	-1.02922	2.39171e-06
Sun2	9.10326	5.37605	9.96282	11.4996	23.8052	19.438	-1.74014	2.52832e-08
Surf2	14.3556	21.2061	22.9269	11.931	11.7016	9.56252	1.08364	0.000265837
Sval3	0.325792	0.380134	0	1.68728	3.1414	2.10546	-1.91645	0.00971884
Sycn	412.473	90.7295	235.237	2878.73	3664.67	3383.3	-4.00235	5.60899e-23
Syn1	0.551719	0.208566	0.556011	0.362567	0.454616	0.371123	3.55426	1.48995e-17
Syne4	0.180373	0.192098	1.24251	0	0.121993	0	4.16906	0.000872977
Synm	4.70809	3.25148	16.747	20.6673	18.227	15.564	-1.37718	0.00302926
Sytl1	20.3346	8.39425	15.8281	32.5634	52.5729	41.897	-1.6722	3.26067e-07
Sytl3	0.371566	0.620404	0.270537	0.217707	0.137028	0.112865	2.00539	0.00417759
Tac1	141.929	42.5777	141.368	49.9728	35.4907	29.7779	1.15557	0.00371612
Tacc2	4.6513	6.39624	5.82073	11.6417	8.23903	9.50952	-1.01584	0.000149901
Tacr1	2.13136	0.908668	2.4767	0.573196	0.371874	0.4064	1.60729	9.67675e-05
Tacstd2	0.928427	0.349042	0.267129	0	0	0.063157	4.8067	0.00535844
Taf1d	61.6669	98.2619	57.7659	26.8389	38.1763	27.5727	1.12907	9.81559e-05
Tagln	721.467	488.614	1221.35	1685.88	1965.55	1428.29	-1.26362	1.82002e-05
Tap1	30.216	24.0919	26.2463	4.65066	5.37753	8.44151	1.98816	7.37514e-13
Tarm1	1.56887	2.98113	3.72551	0	0.061032	0	7.19491	1.11387e-10
Tat	12.4951	13.8145	11.5655	33.5192	15.6576	30.2598	-1.19042	0.000264802
Tax1bp3	79.4089	62.4553	49.6372	105.114	105.073	96.5146	-1.12244	0.000313604
Tbc1d10c	8.07727	4.27869	3.4986	0.80553	1.45111	2.28188	1.49691	0.000350001
Tbc1d2	11.1331	6.23113	8.94868	19.4341	12.0746	13.6481	-1.03791	0.00077133
Tbc1d9	1.76975	2.58046	2.49535	1.33763	0.977971	0.98032	1.09594	0.000568794
Tbx21	0.311454	0.555928	0.314668	0	0.023064	0.10298	3.88232	0.00350477
Tbxa2r	0.665756	0.361762	1.46573	0.904563	1.76719	1.60767	-1.93947	0.00148718
Tc2n	13.7877	15.9798	18.4236	7.09012	5.74212	5.92517	1.24704	1.55567e-07
Tceal1	3.38356	2.28945	2.47435	4.17806	7.56041	3.85988	-1.16279	0.00464151
Tcf21	29.3116	23.1055	21.2404	35.4554	53.1133	53.5554	-1.15489	3.02426e-05
Tcf24	0.050717	1.02552	0.260114	0.103091	0.10727	0.109275	3.19578	0.00461739
Tcf7l1	6.09021	1.12516	2.79155	6.57658	9.64758	9.91953	-2.06641	5.97747e-08
Tdp2	20.7528	35.4602	29.0401	9.02178	15.7247	14.0061	1.01026	0.000335234
Tecr	47.8084	25.6985	35.2974	59.591	84.5744	67.3398	-1.0889	9.01423e-06
Tes	108.633	70.6475	57.9232	220.513	109.321	102.045	-1.0644	0.00312105
Tex9	0.948647	6.75364	4.84766	0.487044	0.394483	0.721951	2.64255	1.15708e-06
Tfrc	62.0002	46.3657	104.657	17.0881	25.6849	17.3218	1.6058	4.09535e-08
Tgm1	1.0607	0.82106	2.04909	0.19957	0	0.050085	4.06248	6.94615e-08
Tgm3	76.0117	0.687904	2.80984	568.722	440.879	592.509	-4.53558	0.0043359
Tgtp2	18.2493	11.4369	16.7828	1.84246	1.62745	2.04403	2.57047	7.73489e-16
Themis2	2.39046	1.1155	1.30835	0.637153	0.642909	0.843009	1.65723	1.2854e-06
Themis3	22.6314	15.5554	10.0354	31.9647	29.0507	36.4026	-1.05361	0.000381598
Thnsl2	13.6569	8.49368	4.5411	14.9959	26.2953	18.3157	-1.33887	0.000927976
Thra	7.25809	7.42595	8.87222	8.64313	11.3492	12.8451	-1.02952	7.08131e-06
Timp1	109.749	35.8672	144.676	8.50044	4.27066	4.63471	3.83319	1.29713e-17
Tinag	7.06019	5.00061	5.3556	15.6692	21.3381	18.4982	-1.84167	2.10309e-10
Tle4	16.5985	3.01736	12.8746	24.1394	19.5532	10.7966	-1.23258	0.00046925
Tlr13	2.5203	2.23904	1.7499	1.32108	0.742483	0.711466	1.26362	0.0054878
Tlr2	13.2947	20.4188	15.5492	2.90187	5.45451	5.74874	1.58237	3.32401e-06
Tm4sf20	371.336	341.042	178.916	906.191	687.246	780.909	-1.60038	5.20648e-07
Tm6sf2	4.04461	1.88427	2.87317	7.17485	7.74848	9.14577	-1.53837	4.9084e-06
Tmem100	11.7679	4.02443	9.02039	4.30862	4.07866	2.67795	1.16394	0.00576175
Tmem132a	1.79792	1.41027	2.22303	0.978103	0.814087	1.1855	1.22829	0.000247284
Tmem139	38.8697	45.9336	37.7561	14.9795	17.936	22.882	1.09149	3.27177e-05
Tmem189	30.299	29.3124	27.302	28.9544	23.7262	46.4266	1.01615	5.77026e-05
Tmem204	3.00291	2.79479	3.20846	5.34517	6.36513	5.44753	-1.13255	0.000296231
Tmem231	0.715552	0.452346	1.05753	1.60527	1.30609	1.72234	-1.49005	0.000845214
Tmem236	28.2522	34.7614	32.7759	64.6104	78.6445	68.6771	-1.3636	8.57274e-12
Tmem254a	2.82271	4.82557	2.29435	16.0585	7.80301	8.1688	5.15541	0.00108966
Tmem263	13.3756	17.8739	22.3338	5.04209	7.09111	5.74094	1.0718	6.20747e-06
Tmem43	17.3242	12.4998	18.8372	56.8355	23.1895	20.6924	-1.29745	0.00114707
Tmem45b	418.326	247.904	184.231	498.655	508.65	473.527	-1.00683	0.0010181
Tmem53	2.77219	2.17283	2.92	3.5648	5.77271	6.65168	-1.6509	0.000215897
Tmigd1	13.5203	464.035	173.137	21.2989	15.0161	21.317	3.35493	0.00359948
Tmprss13	0.253511	0	0	0.895806	2.47314	2.1895	-5.12019	2.72997e-12
Tnf	5.00502	7.59039	9.80064	0.438334	0.471757	0.891487	3.52195	5.46866e-13
Tnfaip2	15.7624	11.1892	14.6022	4.8305	3.02633	2.72367	1.77454	3.36741e-09
Tnfrsf19	0.378764	0.312779	0.491484	0.884691	1.36948	1.25254	-1.70975	6.78282e-05
Tnfrsf21	16.8723	7.56125	12.3183	39.6529	16.865	18.1123	-1.27042	0.00132254
Tnfrsf23	1.80261	0.742871	1.86611	0.270761	0.160249	0.227822	2.88413	1.36627e-07
Tnfrsf4	2.33306	1.39009	1.08743	0.262438	0.316352	0.610158	2.54334	0.000613386
Tnfrsf8	3.34804	0.102848	0.189886	0.137749	0	0	3.39268	3.29454e-05
Tnfrsf9	3.38376	1.72234	2.20228	0.096291	0.104175	0.303599	3.42821	1.06556e-09
Tnfsf11	6.34964	1.63709	1.16788	0.349222	0.427347	0.49237	2.64952	4.74676e-05
Tnfsf14	1.36711	0.871283	0.549838	0.089159	0.094479	0.079025	2.56185	0.00345033
Tnfsf9	1.76318	1.17249	3.64545	0.798527	0.708052	0.375359	1.90635	0.00516045
Tnip1	17.659	9.46417	12.7622	23.5989	22.111	30.6966	-1.18343	6.85384e-06
Tnks1bp1	13.4817	4.62687	9.98394	34.8998	12.6546	16.024	-1.45335	0.00074809
Tnni1	58.4045	8.41303	6.81563	157.888	183.88	186.703	-3.07941	0.000789532
Tnnt2	1.44979	1.33745	0.527602	12.8926	16.3061	9.12702	-3.70666	9.551e-20
Tns1	5.0298	3.08434	8.48179	11.4515	8.47463	8.829	-1.04606	0.00241786
Tnxb	2.71247	2.07401	2.71386	5.21975	4.9155	4.83756	-1.19864	2.67847e-07
Tpm2	115.98	89.5531	191.957	320.691	319.827	277.125	-1.40761	6.89237e-06
Tppp	1.30143	6.28214	3.50257	9.57551	10.8302	13.1497	-1.64142	0.000483396
Tppp3	39.5946	28.5935	52.3585	174.058	176.989	156.093	-2.40208	1.65353e-23
Trabd2b	0.309231	0.09112	0.205009	0.480646	0.616864	0.492731	-1.2106	0.00104157
Traf3ip3	4.05169	1.44575	1.59839	0.746366	0.519694	1.53151	1.06771	0.000566327
Trem1	4.07148	8.0698	4.29795	0.083897	0.070273	0.05746	7.70529	2.2074e-20
Trem2	6.92826	3.9099	7.81533	2.35864	1.98631	3.21792	1.10468	0.00924348
Trem3	2.02098	1.57361	2.37981	0	0.0499	0	6.50992	1.55935e-06
Treml2	1.25143	0.367649	0.681853	0.127534	0.076717	0.297573	2.06924	0.00190933
Trib1	11.146	8.28096	9.8058	26.9796	11.9351	14.9897	-1.11774	0.00155837
Trim16	21.2721	18.7501	17.7494	54.514	35.6514	38.7312	-1.33341	3.90972e-07
Trim30a	6.68781	4.26948	5.41605	3.94497	2.776	3.11297	1.11864	6.54878e-05
Trim30b	0.992986	0.988924	0.637865	0.029976	0.045792	0.053301	3.73055	2.12887e-09
Trim45	0.174298	0.344405	0.273535	0.403635	0.601271	0.733115	-1.79671	0.00612349
Triqk	7.29612	17.3864	12.8007	4.81717	5.9016	5.60755	1.18501	0.00165954
Trnp1	4.17659	6.87065	9.99125	12.536	18.4184	13.417	-1.29126	0.000304433
Trpm6	3.19146	1.2547	2.05472	25.3514	30.9276	38.6364	-4.05638	1.56506e-26
Trpv1	0.267032	0	0	0.650169	1.10711	0.757734	-4.40888	6.91641e-08
Trpv6	0.769617	0	0.102208	1.54621	2.40558	1.41513	-2.67482	0.00100491
Tsku	2.95004	14.9431	1.84955	1.48206	0.253576	4.29645	1.64845	0.00171701
Tspan1	671.411	535.176	476.761	1072.65	1165.77	949.421	-1.0912	7.76545e-07
Tspan33	3.05775	1.71728	2.33919	2.26303	5.72842	6.71882	-1.28828	0.00323349
Tspan4	26.8476	25.8776	29.0699	10.4639	9.23092	9.90603	1.20532	2.96184e-07
Tspan9	3.92774	1.76823	3.70058	5.14739	4.75844	5.25576	-1.01032	0.00128904
Ttc23	5.2911	7.13332	5.68651	3.05476	5.26844	4.28366	-1.15638	0.00232273
Ttll6	3.73846	1.5108	2.06448	3.69537	4.8578	4.68992	-1.42297	0.0012888
Ttpa	0.622867	0.265425	0.742818	0.902291	1.30077	1.14921	-1.53233	0.00146996
Ttr	15.4854	2.09111	4.03665	24.478	41.3127	35.3531	-2.49307	3.84799e-06
Ttyh1	7.63736	6.09607	6.60435	1.79286	1.4409	1.71409	1.77988	4.3277e-09
Tubb4a	1.35004	0.714097	0.876496	2.49935	1.97485	1.76214	-1.72852	1.0667e-05
Tyrobp	131.407	123.44	127.617	46.2498	38.2866	40.2209	1.4248	5.77635e-10
Uba1	33.2944	16.6512	26.1665	55.3691	43.4642	35.3463	-1.0303	0.000382943
Ubd	129.699	86.1827	56.0583	6.28609	3.99376	8.16136	3.90518	1.53536e-24
Ubxn10	0.932522	0.713882	1.02238	1.50903	2.45703	3.02622	-1.49318	3.07476e-06
Ugt2b36	0.058855	2.82609	1.72144	0	0.132977	0.091854	5.30056	5.15032e-06
Ugt2b5	0	57.08	19.6623	0.27286	0.072233	0	7.90017	4.47236e-05
Unc119	69.0902	15.8093	27.6264	51.9059	84.4708	91.2037	-1.17148	0.00618182
Upb1	1.09401	0.688233	0.790524	2.64396	3.78857	3.70201	-2.03256	9.25255e-11
Upf3b	11.0367	15.5235	18.9787	4.36265	8.56912	6.52901	1.0886	0.00116239
Upk1a	4.4095	6.30534	4.69428	12.8038	16.6844	12.4071	-1.53462	6.81429e-08
Upk3b	0.84025	0.412809	0.993229	5.77048	0.423165	2.24173	-2.54913	0.000670297
Urad	0.199031	0.611982	0.279094	0	0	0	5.43952	0.0032214
Usp18	5.71426	4.32468	5.6938	1.48974	1.55984	1.91383	1.45186	3.70521e-06
Usp53	8.04443	6.38505	4.24723	10.6581	11.5805	13.8267	-1.0448	3.13009e-05
Utp20	6.23891	2.08201	4.11674	7.1	7.66567	7.1718	-1.04458	0.00152143
Uvssa	1.90245	4.04679	2.76491	0.775971	1.18529	1.05443	1.36236	0.000472039
Vav2	0.424651	1.76785	1.29523	0.304216	0.548702	0.510671	1.36054	0.00461205
Vcam1	30.1303	16.3983	19.7089	5.60851	5.10859	4.73472	2.05115	3.34571e-13
Vmn1r181	0.269743	0.404523	0.92588	0	0	0	5.18668	0.00173453
Vmp1	93.2461	147.848	167.217	51.4957	32.4641	34.9069	1.54072	5.95911e-07
Vnn1	0.85784	15.5854	3.01539	0.570708	0.312779	0.461569	4.05626	0.000433176
Vtcn1	0.446043	0	0.100595	0.870546	0.90914	0.646692	-2.20558	0.00432826
Wdr5b	2.12376	1.09765	1.96924	2.77757	2.87401	2.6553	1.18349	0.00676062
Wdtc1	7.19822	3.48713	3.7475	9.47061	11.3879	13.6499	-1.48351	5.50423e-07
Wfdc1	11.6731	13.6966	17.5413	31.1369	37.9925	31.5015	-1.59516	8.29937e-11
Wfdc12	12.3592	1.09808	7.3146	0.510452	0.359719	0.208502	3.42374	1.86731e-05
Wfdc17	410.347	477.596	307.092	58.1177	40.6465	46.5003	2.81768	1.45303e-21
Wfdc18	226.878	10.6219	41.797	10.7197	6.64091	8.18798	3.43888	0.0025996
Wfdc2	57.6478	34.7794	42.6476	275.104	313.071	308.736	-2.91974	1.51669e-35
Wfdc21	60.3414	93.3366	70.5367	0.904445	0	0	7.71757	7.21594e-35
Wisp2	4.6431	2.13607	15.4528	0.205615	0.542343	0.591062	3.52013	3.34114e-09
Wnt8b	0.102824	0	0	0.330815	0.781303	0.787288	-3.04782	0.00263133
Wscd2	0.802927	0.44152	1.498	2.20806	2.27674	2.32236	-1.78683	2.1892e-05
Wtip	14.5144	22.1952	25.6662	6.47653	9.10503	11.1651	1.02066	0.00151828
Wwp2	16.1564	13.4776	14.1653	36.9392	36.3166	35.3235	-1.47167	1.19641e-13
Xkr9	4.32566	4.85979	2.45714	11.9303	8.90414	5.17504	-1.25048	0.0016781
Xlr4a	0.797219	3.89084	3.32063	0.330428	0.768446	0.560864	2.58927	9.54329e-05
Xlr4b	3.67356	0.909904	1.27968	0.471949	0.212922	0.215378	3.28883	2.02453e-05
Xylt1	0.369397	0.017452	0.125734	1.57192	0.199869	0.414091	-1.65862	2.29183e-05
Zbp1	146.628	118.669	88.0101	59.3235	30.3362	41.527	1.06475	0.00165464
Zdhhc13	84.7612	89.7755	79.2056	272.481	81.6358	128.067	-1.12845	0.00509718
Zfc3h1	8.69251	13.3322	13.0058	5.09373	4.35088	4.3076	1.09866	2.40071e-06
Zfp182	2.44476	3.60116	3.97693	1.30859	1.64929	1.26246	1.14379	0.000102685
Zfp385b	2.75653	2.68981	2.05667	1.16965	1.45604	1.33918	1.07357	0.000441835
Zfp628	1.13207	0.84016	0.897727	1.65185	2.09207	1.95348	-1.16411	0.000659565
Zfp651	0.957786	0.824219	1.79826	1.99861	2.01163	1.9199	-1.0166	0.00735973
Zfp667	0.851491	1.76018	2.55052	0.288997	0.459677	0.773566	1.4695	0.00391899
Zfp703	9.11722	16.5372	14.2835	3.79794	4.70685	6.12796	1.20548	8.40908e-05
Zfp775	2.79968	0.731644	1.28565	3.17911	2.90847	4.68803	-1.344	0.00475817
Zfp810	4.30578	4.32371	6.65964	1.08448	2.15139	2.57526	1.17327	0.002167
Zfp820	3.41222	6.15634	4.08687	1.73728	1.99134	2.70524	1.22813	0.000792517
Zfp932	8.87413	13.4162	10.6527	4.16429	5.93445	4.90648	1.03787	0.000503826
Zswim7	14.3278	31.9479	29.391	7.0036	8.10396	7.50875	1.52417	9.9445e-05
