# Supplementary figures and images for: Profiling of histone 3 lysine 27 acetylation reveals its role in a chronic DSS-induced colitis mouse model
Source: Royal Society of Chemistry journal article supplement (doi:10.1039/c9mo00070d), 2019-05-20

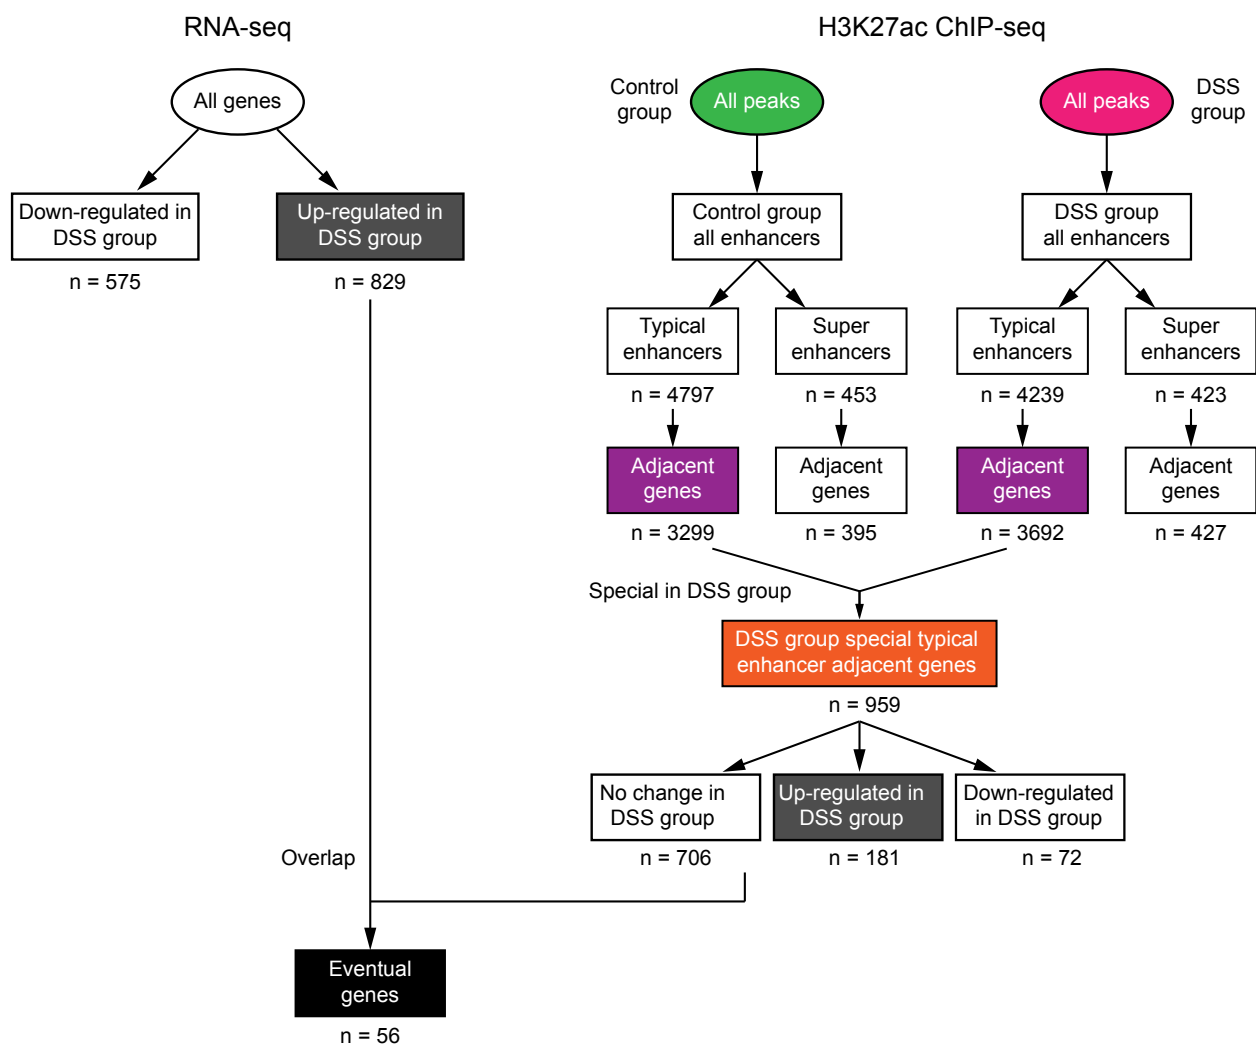

Supplement: c9mo00070d1.pdf [file c9mo00070d1.pdf]
